# Supplementary material for: Improved genome assembly of American alligator genome reveals conserved architecture of estrogen signaling
Source: HighWire-hosted journal article supplement (doi:10.1101/gr.213595.116), 2017-01-30
Supplement: Supplemental_Table_S1.xlsx [file Supplemental_Table_S1.xlsx]

## Sheet: crocPor2
Join	Left Primer	Right Primer	Plate	Well	Est. Product Size	Tm	58 degrees		60 degrees	62 degrees	Final result
('+scaffold-12912', '-scaffold-6193')	CTCCATACCCTTGGTGGAGA	GCTTTAAGGGCTTGCAGCTT	1	1A	538	59.9	nonspecific	1		nonspecific	N
('-scaffold-558', '+scaffold-15232')	GAACCCGTCAAAAAGTCCAA	GCACAAGACCAGGAAGGAAA	1	1B	659	59.92	nonspecific	2		3000	Y
('-scaffold-5325', '+scaffold-14172')	GATGTGCTGCAGGGAAAAAT	GGGAATTTGGTGGTCACA	1	1C	2585	57.59	1800	3		nonspecific	Y
('+scaffold-7965', '+scaffold-15354')	CGCAGATCACACTCGCTTTA	ATGTGACAGTCGCCGCTTT	1	1D	495	60.14	300	4		400	Y
('+scaffold-15831', '+scaffold-421')	ACCACCCCATGGTAGCAAT	GATGTGATCCAATTGGCAAG	1	1E	500	58.91	400	5		none	Y
('-scaffold-11839', '+scaffold-4980')	GACTCCCTGGCAGTTGTGAT	CCTTGCTAGGTGGAGAGTGC	1	1F	4514	59.99	2000	6		nonspecific	Y
('-scaffold-3518', '+scaffold-5867')	TGTCCTAACCAATCTGTTTTTCA	TTTGGCCTACGCTCCATTAT	1	1G	670	58.62	300	7		none	Y
('+scaffold-15364', '+scaffold-14402')	CCCACAAATAGTCCTGTTGGA	CAATCCCTTGCACACCTACA	1	1H	1199	59.55	nonspecific	8		2000	Y
('-scaffold-10396', '-scaffold-17473')	AACAACGGAGGCAAAGGAG	CTTGGAGGGGCTTATCCTTC	1	2A	590	60	1000 1500	9		1000 1500	Y
('-scaffold-14189', '+scaffold-4903')	CCTGGTGTTCTGGTGAAATG	TTCCACAGCATGTAGGCAAA	1	2B	1888	58.97	700 1200	10		none	Y
('+scaffold-11566', '-scaffold-11715')	GTCCTCCTCCAGCTCTCTGA	GAGATCCGGTGAAGCGAGAG	2	1A	598	59.97	900	1	1000		Y
('+scaffold-10562', '-scaffold-9218')	GGCTCCCCTGAGTCTATGCT	GAGAGGCATGGGACTCTTCA	2	1B	388	60.3	2000	2	1800		Y
('-scaffold-10182', '+scaffold-3364')	GCATCCAATTTGCTCTTGAA	TCAGGCTGGACATAAGGAAGA	2	1C	299	58.8	none	3	none	150	Y
('+scaffold-11914', '-scaffold-6549')	TATGACCCCAGCTGACTTCC	TTTCATAGACATTAGGGCTGGA	2	1D	278	58.7	none	4	nonspecific	150	Y
('-scaffold-2794', '-scaffold-8740')	AGATGGCCTCCACCTCTCTC	GTGGACTTTGCCACTCGGTA	2	1E	216	60.8	800	5	800		Y
('+scaffold-8998', '-scaffold-15752')	TGACGCAACTTATCCAGTCG	CAAGTGCAGCATTCCCAGAG	2	1F	238	59.9	nonspecific	6	3000		Y
('-scaffold-8281', '-scaffold-19226')	CGTGTACCCTTTGTTGAAAACC	GCATCAGCTCTCCTCTGTGA	2	1G	237	59.2	2000	7	2500		Y
('+scaffold-15093[60932:111516]', '-scaffold-9897')	CAGTGTCATTGCACCCTGTT	CATGTGGCAGCTTGCTTAAA	2	1H	208	59.6	nonspecific	8	nonspecific	3000	Y
('-scaffold-15661', '+scaffold-13953')	TGCTGCCTTAAGCAAATCAA	GCAGGAAGAGAGCTGAGTGC	2	2A	201	59.6	200	9	200 2000		Y
('-scaffold-16790', '-scaffold-21030')	CCAAACCAGCTTAGGCACAT	GCTGCCATTGTGGGTGTAT	2	2B	1497	59.4	1200	10	800		Y
('-scaffold-17134', '+scaffold-13526')	TCGGTTTCTTGCTTGCCTAT	CAAATAGGGTCGGAGCAGAG	2	2C	392	59.8	nonspecific	11	3000		Y
('+scaffold-1616', '-scaffold-7472')	GGCCCATTAGCCTGACTTCT	ACGGTCTTGCAGGAGTTTGT	2	2D	399	59.8	1000	12	1100		Y
('-scaffold-6913', '-scaffold-169')	GGGAAGTGCATCTGACCATT	GAACCCCATGATTGCATTTT	2	2E	382	59.6	1100	13	1500		Y
('-scaffold-8928', '-scaffold-2850')	CTTTGGAGGAATGGGAAAGG	TTAGACAGCTCTGCCTCCAA	2	2F	462	58.7	nonspecific	14	nonspecific	nonspecific	N
('+scaffold-232', '-scaffold-13536')	TCCTATGACCCCAGCTGACT	GGAAACAATGCGGGTTGTAA	2	2G	487	59.7	none	15	nonspecific	nonspecific	N
('+scaffold-4255', '-scaffold-20618')	GACCAGCCTGCTTTGAACAC	TCTTTGCCAGGCCATAATTC	2	2H	395	60	2000	16	3000		Y
('-scaffold-935', '-scaffold-2519')	CTGCAGTTGGAGTCAGCAG	GCCCAAAACTGGACACAGTA	2	3A	500	58.2	400	17	400		Y
('+scaffold-1660', '-scaffold-6282')	TGTCACCCACACCTTGTAGC	ACACGATGGTGGAGATGGAT	2	3B	1889	59.6	3000	18	300		Y
('+scaffold-4210', '+scaffold-3144')	GGTCATAGAAAAGTGAATGCTGGT	TCTGAGGTGCTCTGGGTTAGA	2	3C	377	60	nonspecific	19	200 1200		Y
('-scaffold-10817', '+scaffold-9907')	TAGATGCTAGGGTCGGAAGG	TGTAGGCCCAGCACTCTTTC	2	3D	392	59.3	nonspecific	20	3000		Y

## Sheet: ghanGan
Join	Left Primer	Right Primer	Plate	Well	Est. Product Size	Tm	58 degrees	Gel column	60 degrees	62 degrees	Final result
('+scaffold368', '-scaffold32962')	GGGATTGTTCCACTCACCTG	TGGGGGAAATGAAGTAATAAAAA	1	2C	285	58.76	nonspecific	1			N
('-C16767974', '-scaffold33811')	CAAATTCAAAGTAAAATGAGGATGG	TCACAAACTCTTGGTTTCTGATCT	1	2D	243	59.28	200	2			Y
('+scaffold31622', '-scaffold17058')	ACACGCAGATTGGGGTCCT	AAATCCTCTTTTGACTGGTGGT	1	2E	389	58.97	none	3			N
('-scaffold33295', '+C16870580')	TGAATGGCACAGCACTGAAT	GGTTTTGTCACAGGGAATGG	1	2F	247	60.19	nonspecific	4			N
('+scaffold28084', '-scaffold17054')	TGTACAGCTGAAGGGGTGTG	AGCTAAGGCAGAAGGGGATG	1	2G	246	59.74	nonspecific	5			N
('+scaffold17564', '+scaffold8800')	CCTCAGGTGGGGGAATTAGT	TCTTCGGATTAGCCGTCAAG	1	2H	165	60.15	400	6			Y
('+scaffold37565', '+scaffold25465')	GCATTTCCAATCCAACTGAAA	CCCTAGAATTTGCCATTTGC	1	3A	342	59.51	300	7			Y
('-scaffold15978', '-scaffold41241')	CACCTGAATTTCATGCCACA	CCCACAGTTTATTACTCCCTGA	1	3B	527	58.09	500	8			Y
('+scaffold6707', '+C16699422')	CATGCTCAGAGGCAGACTCA	TGTTTACTAGGGGTGTATGAAATGA	1	3C	400	58.86	none	9			N
('-scaffold6555', '-scaffold40815')	TGCAAATGGGTGTGGAATAA	CAAAGGATGTTTGGGGACTG	1	3D	245	59.77	1000	10			Y
('-scaffold5596', '-C16699346')	TCAGATGGCAAGGTTTTGAA	AAAAAGCCCCATGACTTTCTC	1	3E	299	59.23	500 1000 3000	11			N
('+scaffold32631', '-C16687037')	ATTCCCTTCTTCCAGGCACT	CATCCAAGCAGGTCAGACTTT	1	3F	204	59.32	nonspecific	12			N
('+C16631739', '-scaffold34425')	TTGCTGATTCGGAACACTGA	TTGGCCATAGAGCATGAGC	1	3G	304	59.91	1500	13			N
('-scaffold28505', '+scaffold20551')	TCTGCTCTCACCTCCTGTCA	TCCCTCCTATGGCTTGTTTG	1	3H	2988	59.69	3000	14			Y
('+scaffold8229', '+scaffold37215')	GGCCAGTGGAGAAGCATTTA	CCCCAGCAGGTATGAACTTT	1	4A	234	59.02	3000	15			Y
('-scaffold39990', '-C16841336')	TGCCAGCTAACAGGAGTGTG	GCTGCATTCTGTGTTTCCAA	1	4B	282	59.83	1200	16			Y
('-scaffold78', '-C15957332')	ATGCCAGCTTTTGCACTGA	TGAAAAATCCGCAACAAACA	1	4C	237	60.07	1500	17			Y
('-C16754508', '+scaffold3680')	GCGCCTGGGAATAACATCTA	ACGTAATCTCCAGGCTGTGG	1	4D	237	60.03	nonspecific	18			N
('+scaffold8952', '-scaffold19313')	TCAGACTTCCCACTTCAGCA	TTGGTCAAAAACTGGGCACT	1	4E	170	59.54	nonspecific	19			N
('-scaffold7164', '-scaffold24171')	CTCGACTCCATGCGATGC	GGAAGACCAGGATGTAGACCA	1	4F	495	58.98	500	20			Y
('-scaffold18733', '-scaffold7620')	GGCCCATAGTGGTAGTCGAA	CAACACTTCGACGGGTCCT	2	3E	283	60	nonspecific	1	none	none	N
('+scaffold38577', '+scaffold35596')	ATTGTGACCATGGCCCTTTA	AAGCTTACAGGCCAACGAGA	2	3F	363	60	2000	2	3000		Y
('-scaffold2734[27956:310722]', '+scaffold25858')	CCAGCTGAGATCCCTCGTAT	TGCAGGTATGCTGACTTGAGA	2	3G	201	59.3	nonspecific	3	none	none	N
('-scaffold19506', '-scaffold29089')	TGAAAGCACCGGTGTAGAAA	GTTTCATAGATTTAGGTTCGGAAGG	2	3H	210	59.3	none	4	none	none	N
('+C16420306', '+scaffold13039[66060:146418]')	CATCCTCATATGTGCGCAGT	ATTCTTGAAGTGCGGTGTCC	2	4A	245	59.7	3000	5	1200 3000		Y
('+scaffold31982[28799:74141]', '+scaffold21292')	GCACTTTGTTCAGTGGCAGA	TCACACTTACCCAGGGAACC	2	4B	231	59.8	nonspecific	6	none	none	N
('+scaffold32921', '+scaffold19550')	CGCTACCACTGCCCCTATAA	ACAGCTGTCGTAAGGCTGGT	2	4C	224	59.9	nonspecific	7	400		Y
('+scaffold11271[13733:23837]', '-scaffold11271[0:8733]')	TCCCAAGGAATGTGCTTTTC	GGACTGCACATGTGTTCCAC	2	4D	516	60	3000	8	3000		Y
('-scaffold33552', '+scaffold27396')	GCTTGCTTGAGTGTGACCAG	CCAGCGAGTGGAAGACGTAG	2	4E	211	59.6	3100	9	none		Y
('-scaffold12514', '+scaffold21918[86239:179934]')	GACATGTGCCATCTCGTCAC	GAGAACCGTGTCAGGCATTT	2	4F	184	60.1	3000	10	none		Y
('+scaffold7346', '-scaffold25901')	ATTCACAGGCTCTGGCTCAC	GGCAGCTGTTAACGCAAGA	2	4G	989	60.1	nonspecific	11	nonspecific	3000	Y
('+scaffold9040[1:142056]', '-C16407784')	TGGGTGCTTGCAGACATAAC	CCATGGGAATTAAGCCTTTC	2	4H	245	58.5	400	12	400		Y
('-scaffold17084', '-scaffold4466')	TCAGCCACTGAAAGCACTGT	ATGAGGATACACCGGACTGG	2	5A	244	59.6	nonspecific	13	none		Y
('-scaffold36091', '-scaffold8319')	CTGATAAATGGGGCATTTGG	GACGATATAATCCGCCGTTG	2	5B	226	60.1	nonspecific	14	none		Y
('+scaffold34258', '-scaffold13146')	AGCTGGACAGGGAATTTTCA	GGGCTCTGTCCAACTCTCTG	2	5C	214	59.7	3000	15	none		Y
('+C15891001', '-scaffold13615[0:32095]')	GGTGGCTCAGTTCGGATGT	AGCACGTGTGGAGAGGAGAG	2	5D	290	60.6	3000	16	none		Y
('-scaffold14990', '-scaffold17825')	TGTGGCTTGTCAGCTGTTTC	ATCAAACCACCGTCACCACT	2	5E	180	60	2500	17	3200		Y
('+scaffold2822', '-scaffold3431')	TGGCTTGATTCCAACCCTAC	CGGAGTATGGTACGAGGATGA	2	5F	392	59.9	none	18	none	none	N
('-C16153119', '+scaffold15621[0:1397]')	AACAGGGAGAATGGGAAACC	TGCCAACAGGCTTCTAGCAT	2	5G	222	60.2	3000	19	none		Y
('-scaffold40551', '+scaffold27825')	CTGAGCTCCCTTCCAATCAC	TTCACAAAAGGCAGAGAAAGG	2	5H	235	59.8	2500	20	none		Y
('-scaffold41656', '+C16778752')	TGAATGGCAAAGAGTTTGGA	GAACCATGGGCCACCTAATA	2	6A	248	59.2	2500	21	3000		Y
('-C16297158', '-scaffold7489[0:67587]')	CTATTTTTCCCCCACGAACA	CGTTTAGAATGGGTAGCTGGTT	2	6B	247	59.7	3000	22	3200		Y
('+C15959934', '+C15946390')	ATCTCTCCTCCCACAACTGC	AGAAGGTGGGTGCAAAAATG	2	6C	204	59.3	1500	23	3200		Y
('+C16734562', '-scaffold20565')	ACAGCAGGGATGCGTAGACT	TCTTCAACAAGGGGTTTCAACT	2	6D	270	59.9	3000	24	none		Y
('+scaffold39641[8265:9777]', '-scaffold5249[0:81567]')	TAGGTCTGGAAGGGACCTCA	CCCTGTTCCTTATTCCTTTGG	2	6E	246	59.6	nonspecific	25	3000		Y
('+C15771301', '-C16555963')	CACATGATACCAAATTGGACAAGG	TGCCCCTAGGATTCTTTTTACC	2	6F	250	60.6	none	26	none	none	N
('-scaffold20154', '-scaffold22360')	CCAACACTGACACAACCTTCA	AATCCCAATGAGGATCAAAGG	2	6G	289	59.6	1200	27	none		Y
('-scaffold13543', '+C16332958')	TTACAAAAGCCGATCGCATA	CGCCTTCTGAGGGTTCTGTA	2	6H	360	59.3	none	28	none	none	N
('-scaffold15525', '-scaffold24891')	CCAACTGGCTAAGCAGCAG	ACCCCTCAGGTCCTTTTCTG	2	7A	300	59.7	1300	29	200		Y
