# Supplementary material for: Improved genome assembly of American alligator genome reveals conserved architecture of estrogen signaling
Source: HighWire-hosted journal article supplement (doi:10.1101/gr.213595.116), 2017-01-30
Supplement: Supplemental_Table_S2.xlsx [file Supplemental_Table_S2.xlsx]

## Sheet: Table "Repeats"
Table Repeats. - Total repetitive content in new Alligator mississipiensis assembly. Repeats were identified using RepeatMasker (Smit et al. 2013) and known A. mississipiensis repeats present in RepBase (v21.02).
Repeat Classification						Count	Bases	Percent of Genome
Total Repetitive Content						2344209	764773894	0.3618
	Low Complexity Repeats					19424	2542329	0.0012
	Transposable elements					2324785	762231565	0.3606
		Class I Retrotransposons				873102	378061517	0.1791
			Non LTR retrotransposons			680151	277145402	0.1313
				LINEs		548805	257148779	0.1217
					CR1	372043	191696032	0.0907
					Jockey	7787	4165161	0.002
					L1	930	530432	0.0003
					L2	34151	7968442	0.0038
					Penelope	93393	18296356	0.0087
					R2	1589	924570	0.0004
					RTE	25958	18782782	0.0088
					Tx1	12954	14785004	0.007
				SINEs		131346	19996623	0.0096
					5S-Deu-L2	12863	2223775	0.0011
					L2	2016	395266	0.0002
					MIR	47310	5611390	0.0027
					tRNA	34663	5446159	0.0026
					U	8637	2237141	0.0011
					Unknown	25857	4082892	0.0019
			Long Terminal Repeats			174624	98989011	0.0469
					DIRS	1075	251504	0.0001
					ERV1	45629	22123831	0.0105
					ERV4	18791	7739117	0.0037
					ERVL	7148	4852233	0.0023
					Gypsy	101981	64022326	0.0303
			Unclassified retrotransposons			18327	1927104	0.0009
		Class II DNA transposons				1451683	384170048	0.1815
			Cut and Paste DNA transposons			1423887	378594512	0.1789
					Academ	489	393269	0.0002
					Harbinger	426	103599	0
					hAT	633510	173820814	0.0821
					Kolobok	6080	1051141	0.0005
					Maverick	1623	1780268	0.0008
					PIF/Harbinger	604779	157976775	0.0747
					PiggyBac	650	687434	0.0003
					TcMariner	84333	22785307	0.0108
					Unknown	91997	19995905	0.0095
			Rolling circle transposons			27796	5575536	0.0026
					Helitron	27796	5575536	0.0026

## Sheet: Table "Assembly"
Table "Assembly" - Percent of genome derived from all repeats as well as the three dominant TE super families in crocodilians. 1 Current assembly. 2 Assembly from Green et al. (2014)
Genome	Alligator1	Alligator2	Crocodile	Gharial
All Repeats	36.2	37.7	37.5	37.6
Harbingers	7.5	7.4	7.1	7.3
hATs	8.2	8.1	7.8	8.1
CR1s	12.2	9.6	10.5	10.9
