# Supplementary material for: Improved genome assembly of American alligator genome reveals conserved architecture of estrogen signaling
Source: HighWire-hosted journal article supplement (doi:10.1101/gr.213595.116), 2017-01-30
Supplement: Supplemental_Table_S3.xlsx [file Supplemental_Table_S3.xlsx]

## Sheet: Sheet1
SRA accession	Biosample accession	Library ID	clutch ID	tissue	incubation time after stage 19 (days)	temperature	notes
SRR3593681	SAMN05072576	18_G_30d_M	18	gonad	30	MPT
SRR3593682	SAMN05072566	18_G_3d_M	18	gonad	3	MPT
SRR3593693	SAMN05072556	18_G_0d_X	18	gonad	0	N/A
SRR3593704	SAMN05072575	18_G_30d_F	18	gonad	30	FPT
SRR3593715	SAMN05072565	18_G_3d_F	18	gonad	3	FPT
SRR3593726	SAMN05072591	18_M_3d_M	18	mesonephros	3	MPT
SRR3593737	SAMN05072601	18_M_30d_M	18	mesonephros	30	MPT
SRR3593738	SAMN05072600	18_M_30d_F	18	mesonephros	30	FPT
SRR3593739	SAMN05072590	18_M_3d_F	18	mesonephros	3	FPT
SRR3593740	SAMN05072581	18_M_0d_X	18	mesonephros	0	N/A
SRR3593683	SAMN05072541	18_A_3d_M	18	adrenal	3	MPT
SRR3593684	SAMN05072551	18_A_30d_M	18	adrenal	30	MPT
SRR3593685	SAMN05072540	18_A_3d_F	18	adrenal	3	FPT
SRR3593686	SAMN05072531	18_A_0d_X	18	adrenal	0	N/A
SRR3593687	SAMN05072550	18_A_30d_F	18	adrenal	30	FPT
SRR3593688	SAMN05072537	10_A_3d_M	10	adrenal	3	MPT
SRR3593689	SAMN05072547	10_A_30d_M	10	adrenal	30	MPT
SRR3593690	SAMN05072546	10_A_30d_F	10	adrenal	30	FPT
SRR3593691	SAMN05072536	10_A_3d_F	10	adrenal	3	FPT
SRR3593692	SAMN05072529	10_A_0d_X	10	adrenal	0	N/A
SRR3593694	SAMN05072596	10_M_30d_F	10	mesonephros	30	FPT
SRR3593695	SAMN05072579	10_M_0d_X	10	mesonephros	0	N/A
SRR3593696	SAMN05072586	10_M_3d_F	10	mesonephros	3	FPT
SRR3593697	SAMN05072587	10_M_3d_M	10	mesonephros	3	MPT
SRR3593698	SAMN05072597	10_M_30d_M	10	mesonephros	30	MPT
SRR3593699	SAMN05072555	13_G_0d_X	13	gonad	0	N/A
SRR3593700	SAMN05072563	13_G_3d_F	13	gonad	3	FPT
SRR3593701	SAMN05072573	13_G_30d_F	13	gonad	30	FPT
SRR3593702	SAMN05072574	13_G_30d_M	13	gonad	30	MPT	this embryo showed a female gene expression pattern despite being incubated at male-producing temperature, and thus was excluded from further analyses
SRR3593703	SAMN05072564	13_G_3d_M	13	gonad	3	MPT
SRR3593705	SAMN05072599	13_M_30d_M	13	mesonephros	30	MPT	this embryo showed a female gene expression pattern despite being incubated at male-producing temperature, and thus was excluded from further analyses
SRR3593706	SAMN05072589	13_M_3d_M	13	mesonephros	3	MPT
SRR3593707	SAMN05072580	13_M_0d_X	13	mesonephros	0	N/A
SRR3593708	SAMN05072598	13_M_30d_F	13	mesonephros	30	FPT
SRR3593709	SAMN05072588	13_M_3d_F	13	mesonephros	3	FPT
SRR3593710	SAMN05072583	4_M_3d_M	4	mesonephros	3	MPT
SRR3593711	SAMN05072593	4_M_30d_M	4	mesonephros	30	MPT
SRR3593712	SAMN05072582	4_M_3d_F	4	mesonephros	3	FPT
SRR3593713	SAMN05072577	4_M_0d_X	4	mesonephros	0	N/A
SRR3593714	SAMN05072592	4_M_30d_F	4	mesonephros	30	FPT
SRR3593716	SAMN05072562	10_G_3d_M	10	gonad	3	MPT
SRR3593717	SAMN05072572	10_G_30d_M	10	gonad	30	MPT
SRR3593718	SAMN05072571	10_G_30d_F	10	gonad	30	MPT
SRR3593719	SAMN05072561	10_G_3d_F	10	gonad	3	FPT
SRR3593720	SAMN05072554	10_G_0d_X	10	gonad	0	N/A
SRR3593721	SAMN05072532	4_A_3d_F	4	adrenal	3	FPT
SRR3593722	SAMN05072542	4_A_30d_F	4	adrenal	30	FPT
SRR3593723	SAMN05072527	4_A_0d_X	4	adrenal	0	N/A
SRR3593724	SAMN05072543	4_A_30d_M	4	adrenal	30	MPT
SRR3593725	SAMN05072533	4_A_3d_M	4	adrenal	3	MPT
SRR3593727	SAMN05072584	9_M_3d_F	9	mesonephros	3	FPT
SRR3593728	SAMN05072594	9_M_30d_F	9	mesonephros	30	FPT
SRR3593729	SAMN05072578	9_M_0d_X	9	mesonephros	0	N/A
SRR3593730	SAMN05072595	9_M_30d_M	9	mesonephros	30	MPT
SRR3593731	SAMN05072585	9_M_3d_M	9	mesonephros	3	MPT
SRR3593732	SAMN05072569	9_G_30d_F	9	gonad	30	FPT
SRR3593733	SAMN05072553	9_G_0d_X	9	gonad	0	N/A
SRR3593734	SAMN05072559	9_G_3d_F	9	gonad	3	FPT
SRR3593735	SAMN05072560	9_G_3d_M	9	gonad	3	MPT
SRR3593736	SAMN05072570	9_G_30d_M	9	gonad	30	MPT
