# Supplementary material for: Improved genome assembly of American alligator genome reveals conserved architecture of estrogen signaling
Source: HighWire-hosted journal article supplement (doi:10.1101/gr.213595.116), 2017-01-30
Supplement: Supplemental_Table_S4.xlsx [file Supplemental_Table_S4.xlsx]

## Sheet: Gonad 30d Female-biased
Gene ID	Gene symbol	Mean male expression (FPKM)	Mean female expression (FPKM)	Log2 fold change	FDR-adjusted p-value
AMISG000105	-	10.8585	34.2855	1.65878	0.0282469
AMISG000108	EFHC2	4.94018	29.8223	2.59376	0.00204108
AMISG000151	-	2.73089	16.3196	2.57916	0.00204108
AMISG000178	WNT4	3.62714	16.4804	2.18384	0.00913986
AMISG000185	CCDC30	9.34296	28.0028	1.58362	0.0157388
AMISG000187	ZMYND12-1	19.2823	61.2608	1.66769	0.0224934
AMISG000241	-	9.31577	31.9962	1.78015	0.0118067
AMISG000365	FSD1	5.64962	21.1451	1.90409	0.0205944
AMISG000424	ARG2	6.12955	30.7037	2.32456	0.0157388
AMISG000456	-	1.17883	13.8077	3.55005	0.00204108
AMISG000585	-	7.20403	48.1383	2.74031	0.00204108
AMISG000624	SPON1	26.0418	135.391	2.37823	0.00356734
AMISG000681	STK33	2.32796	26.1413	3.48919	0.00204108
AMISG000773	-	0.219848	1.82188	3.05085	0.0118067
AMISG000869	-	1.01626	9.10328	3.16312	0.0391997
AMISG000949	-	3.18395	25.6971	3.01272	0.00204108
AMISG001115	WNT11	7.9377	77.2149	3.28209	0.00204108
AMISG001268	CALML4	12.9236	54.2203	2.06883	0.0349672
AMISG001396	-	6.20263	50.0445	3.01226	0.00204108
AMISG001400	FAH	7.62704	38.4233	2.33279	0.00204108
AMISG001420	BNC2L	4.86493	46.9642	3.27107	0.00204108
AMISG001431	GATM	5.27075	34.5778	2.71377	0.00204108
AMISG001470	GLDN	17.9115	94.8377	2.40457	0.00204108
AMISG001716	CYP11A1	95.0123	329.748	1.79518	0.00356734
AMISG001725	ZP3	43.2899	427.083	3.30241	0.00204108
AMISG001859	-	1.48788	6.21251	2.06192	0.0134561
AMISG001967	CYP2E1	1.50479	6.0534	2.00819	0.0387373
AMISG001994	VSTM2L	4.62515	37.0626	3.00239	0.00204108
AMISG002008	JARID2	11.688	32.6768	1.48324	0.0441196
AMISG002028	OVALX	3.39962	13.5847	1.99853	0.0387373
AMISG002087	SH2D4A-1	4.53309	23.9103	2.39906	0.00816017
AMISG002186	BMP3	1.40457	16.9188	3.59042	0.00204108
AMISG002351	ISM1	0.540534	11.7577	4.44307	0.0118067
AMISG002428	MKRN4	4.39819	34.3881	2.96692	0.00204108
AMISG002702	BMP7B	1.39616	9.79742	2.81094	0.0349672
AMISG002770	SLC13A3	1.85693	15.4081	3.05269	0.00356734
AMISG002780	-	2.15753	7.5412	1.80541	0.0487658
AMISG002971	APOV1	4.02536	28.095	2.80312	0.0329831
AMISG002994	UPK1B	2.07573	130.574	5.9751	0.00204108
AMISG003057	-	9.96241	63.0164	2.66116	0.0405744
AMISG003143	PDZK1	8.29527	59.5528	2.84381	0.00816017
AMISG003188	NRIP1	8.52169	34.2116	2.00527	0.00713776
AMISG003347	-	1.13499	19.0079	4.06585	0.00204108
AMISG003381	-	5.03262	33.5674	2.73768	0.00204108
AMISG003403	-	0.686601	3.53871	2.36568	0.0329831
AMISG003464	-	28.3752	208.849	2.87975	0.00604775
AMISG003492	-	1.10638	7.23654	2.70945	0.0304148
AMISG003507	FAM159A	0	2.76931	0	0.0134561
AMISG003583	FAAH-2	1.02918	13.0521	3.66472	0.00713776
AMISG003585	FAAH-1	25.0087	143.558	2.52113	0.00204108
AMISG003643	UMODL	0.444181	23.9865	5.75493	0.00204108
AMISG003644	DRC7	1.79239	10.3542	2.53026	0.00204108
AMISG003645	KATNB1	18.678	54.9052	1.5556	0.0224934
AMISG003710	FABP5	68.2701	219.889	1.68745	0.0218769
AMISG003736	-	0.952324	6.19648	2.70193	0.0405744
AMISG003758	-	1.95391	20.608	3.39877	0.00204108
AMISG003768	-	5.04252	33.7958	2.74463	0.00204108
AMISG004084	ADGRV1	0.441824	1.5325	1.79435	0.0179141
AMISG004094	NR2F1-2	9.9452	42.7259	2.10304	0.0405744
AMISG004200	-	2.11382	11.2373	2.41037	0.034486
AMISG004275	-	1.90299	14.0155	2.88068	0.00204108
AMISG004317	NPHS2	8.79086	45.8877	2.38403	0.00816017
AMISG004367	LRRC52	32.4342	96.4815	1.57274	0.0179141
AMISG004384	FMO3	1.29369	14.3123	3.46769	0.00356734
AMISG004690	IL17D	0	6.49874	0	0.00204108
AMISG004740	-	3.09101	14.3271	2.2126	0.00204108
AMISG004848	-	5.28134	27.3926	2.37481	0.00204108
AMISG004899	-	0	7.83171	0	0.0100622
AMISG005026	-	0.562234	2.07329	1.88268	0.0432549
AMISG005032	-	16.8138	446.594	4.73125	0.00204108
AMISG005076	ACY3	3.93777	22.1881	2.49433	0.037803
AMISG005087	-	1.70529	12.4304	2.86578	0.0126421
AMISG005088	GLYATL3	1.02512	7.69438	2.90801	0.0401211
AMISG005169	-	3.47147	15.4374	2.15281	0.0243004
AMISG005194	-	7.37767	37.8726	2.35992	0.00204108
AMISG005392	CLDN6	1.06572	11.5751	3.44113	0.0224934
AMISG005446	HYAL2	32.245	95.3212	1.56372	0.0288014
AMISG005474	-	8.46712	46.3679	2.45318	0.00204108
AMISG005548	AMBP	5.48568	26.8239	2.28978	0.0142304
AMISG005569	-	1.21556	5.43754	2.16133	0.0396667
AMISG005581	-	0.268778	3.95995	3.881	0.0109457
AMISG005592	-	57.1412	146.073	1.35409	0.0231024
AMISG005614	ASTN2	37.9899	151.946	1.99987	0.0218769
AMISG005833	-	4.92858	31.8933	2.69401	0.00204108
AMISG005847	GAMT	56.9888	160.461	1.49348	0.0414854
AMISG005872	-	10.7628	97.2155	3.17514	0.00204108
AMISG005893	S100A11	221.679	624.413	1.49403	0.0266267
AMISG005926	HBZ	85.1527	507.502	2.57529	0.00204108
AMISG006014	TTC34-1	21.2928	69.4524	1.70566	0.0401211
AMISG006019	-	1.63289	9.20097	2.49436	0.00204108
AMISG006049	-	1.65699	6.97623	2.07388	0.0231024
AMISG006052	DRAXIN	2.28106	26.9816	3.5642	0.00204108
AMISG006200	SULT1C3	11.4629	48.6514	2.08551	0.0149937
AMISG006286	-	13.2387	68.8818	2.37936	0.00913986
AMISG006316	CDHR5-1	5.24953	26.372	2.32875	0.0479451
AMISG006352	SYT12	1.07955	17.5055	4.01931	0.00487238
AMISG006357	B4GALNT4	1.62232	6.50376	2.00321	0.0199504
AMISG006361	-	88.366	288.349	1.70625	0.0224934
AMISG006398	MYRF	6.51421	29.1148	2.16009	0.00204108
AMISG006426	ZP1	0.208514	4.33178	4.37674	0.00487238
AMISG006609	-	23.9756	141.317	2.55929	0.00713776
AMISG006680	-	1.31806	10.9259	3.05126	0.0109457
AMISG006712	HMGCS2	2.93947	17.7817	2.59677	0.00204108
AMISG006773	GJB2	4.58649	21.5882	2.23478	0.0109457
AMISG006886	SLC22A6	3.8618	21.4915	2.47642	0.00204108
AMISG006887	-	3.90757	26.1622	2.74314	0.00713776
AMISG006888	-	1.68306	22.4039	3.73459	0.00204108
AMISG007112	-	0.711641	5.55462	2.96447	0.0149937
AMISG007145	-	0.851187	7.23764	3.08797	0.0142304
AMISG007217	PPM1E	1.2854	11.0592	3.10496	0.00204108
AMISG007506	F3	8.20908	35.122	2.09708	0.0179141
AMISG007768	-	0	6.49851	0	0.0309463
AMISG007769	-	18.042	57.0043	1.65971	0.00713776
AMISG007811	-	0.848597	4.77515	2.4924	0.00487238
AMISG007816	CDH16	10.206	29.6608	1.53913	0.0391997
AMISG007830	CDH5	13.8887	37.5437	1.43466	0.0334893
AMISG008017	GPLD1	4.23506	19.491	2.20235	0.00204108
AMISG008076	LY86	17.958	105.877	2.55969	0.00204108
AMISG008097	MARVELD3L	1.85582	15.8895	3.09794	0.00816017
AMISG008115	SLC37A4	24.4476	65.8134	1.42869	0.0391997
AMISG008173	SOCS1	11.0163	54.2751	2.30065	0.00913986
AMISG008211	-	9.76625	215.037	4.46064	0.00204108
AMISG008240	PDILT	1.33786	15.6547	3.5486	0.00204108
AMISG008241	ACSM4	8.65085	39.6247	2.19549	0.0368661
AMISG008409	-	322.253	929.862	1.52882	0.0304148
AMISG008410	FTL	465.254	1565.91	1.75091	0.0410227
AMISG008418	CCDC155	0.394454	3.77801	3.2597	0.0359217
AMISG008441	DNAAF3	8.50709	26.0588	1.61503	0.0419301
AMISG008599	HSD17B1	135.575	1661.9	3.61567	0.00204108
AMISG008707	UGT1A1	32.0192	133.281	2.05747	0.0231024
AMISG008750	FTCD	22.2489	77.7699	1.80548	0.0354479
AMISG008858	TFPI	37.3206	100.272	1.42587	0.0479451
AMISG008986	-	5.39765	19.9487	1.88589	0.0419301
AMISG009122	PNLDC1	6.03029	28.6902	2.25026	0.00204108
AMISG009124	SLC22A3	1.62058	6.68258	2.04389	0.0277031
AMISG009125	-	0.858961	5.90525	2.78133	0.0271527
AMISG009128	PLG	0.705439	5.26413	2.8996	0.00204108
AMISG009131	AGPAT4	4.87018	20.0214	2.03949	0.0271527
AMISG009148	-	3.16525	13.2633	2.06705	0.0254788
AMISG009155	-	1.86973	7.07032	1.91895	0.0391997
AMISG009169	-	2.65683	22.1617	3.06029	0.00816017
AMISG009171	-	6.90468	41.8426	2.59933	0.00604775
AMISG009489	-	0.910113	3.27574	1.8477	0.0495673
AMISG009545	EMX2	6.40824	28.9658	2.17635	0.0192798
AMISG009568	TDRD1	1.77507	8.3558	2.23491	0.0271527
AMISG009729	ZBTB7C	0.629097	7.13806	3.50418	0.0118067
AMISG009897	FST	2.72132	63.0844	4.53491	0.00204108
AMISG009901	-	4.45246	15.291	1.78001	0.0186027
AMISG010087	RASIP1-1	2.41651	7.10756	1.55643	0.0354479
AMISG010143	BCO2	1.61505	8.91296	2.46433	0.0142304
AMISG010157	SIK1	8.34938	25.7977	1.6275	0.0134561
AMISG010230	ROBO4	12.5153	39.1167	1.64409	0.00913986
AMISG010240	APOM	3.2861	14.4854	2.14015	0.0212344
AMISG010283	CATH2	4.51803	206.683	5.51558	0.00204108
AMISG010284	-	3.03002	142.379	5.55426	0.00204108
AMISG010375	FRY	5.51768	19.1327	1.79391	0.00356734
AMISG010678	TNFSF10	15.0437	53.9763	1.84317	0.0179141
AMISG010711	C1QTNF2	1.41862	9.28665	2.71067	0.0339876
AMISG010727	ARHGEF37	0.662135	4.11908	2.63713	0.0319616
AMISG010730	TLR22	1.40464	10.4539	2.89577	0.00713776
AMISG010800	RAD50	33.7931	104.912	1.63438	0.00913986
AMISG010847	LECT2L	231.411	709.854	1.61707	0.0319616
AMISG010872	COL23A1	1.1157	10.4628	3.22926	0.0172186
AMISG010967	FXYD2-1	94.0518	468.383	2.31616	0.0387373
AMISG011138	SLCO2B1	35.7753	83.5151	1.22307	0.0491647
AMISG011167	LIMA1	13.7012	39.4182	1.52456	0.034486
AMISG011224	TMIGD1	5.1407	19.8026	1.94566	0.0368661
AMISG011234	FAM110C	0.501703	7.52046	3.90591	0.0266267
AMISG011291	ASAP1	4.39554	13.9071	1.66171	0.0288014
AMISG011324	GREB1	0.783584	51.0135	6.02465	0.00204108
AMISG011505	RAPGEF5	1.52221	16.823	3.4662	0.00204108
AMISG011538	LRP6	2.06682	10.2073	2.30412	0.0192798
AMISG011539	-	7.07099	32.2847	2.19087	0.0164845
AMISG011617	NRAP	0.368432	2.51902	2.77339	0.00204108
AMISG011655	KYNU	0.68396	3.8878	2.50697	0.0339876
AMISG011789	BIN1	19.8229	82.5291	2.05773	0.00604775
AMISG011802	IGFBP2	105.061	293.407	1.48168	0.0314575
AMISG011902	ANKRD24-1	0.189868	1.62899	3.10091	0.0298902
AMISG011912	HPSE2-1	5.49478	18.9006	1.7823	0.045404
AMISG011957	TBXA2R	2.74874	19.5878	2.83311	0.0134561
AMISG011964	MFSD12	2.35106	18.3821	2.96692	0.0186027
AMISG011972	SMIM24	0	5.07358	0	0.00204108
AMISG012177	ALB	0.340741	33.3406	6.61246	0.0314575
AMISG012263	CCDC158	4.00997	23.3899	2.54422	0.00487238
AMISG012307	C5	0.544043	2.14578	1.97971	0.0349672
AMISG012308	RFXANK	4.81166	17.5569	1.86743	0.0293426
AMISG012310	NCAN	0.384895	5.1464	3.74103	0.00356734
AMISG012512	SLC12A1	9.583	61.6073	2.68455	0.00204108
AMISG012559	-	2.32934	6.98158	1.58363	0.0483608
AMISG012566	CFC1B	0	7.92979	0	0.00204108
AMISG012601	-	1.63968	11.1561	2.76635	0.0179141
AMISG012626	PRUNE2	0.295266	1.51441	2.35867	0.0266267
AMISG012628	PCSK5	16.3616	48.1886	1.55838	0.0149937
AMISG012643	ALDH1A1	62.7513	352.444	2.48968	0.0109457
AMISG012672	DOCK8	0.93044	3.71009	1.99547	0.00816017
AMISG012680	LRP8	14.0192	44.0058	1.65029	0.0164845
AMISG012704	GLDC	2.99497	14.2588	2.25123	0.0142304
AMISG012760	HBG1	71.7163	451.946	2.65578	0.00204108
AMISG012846	CHST15	2.99824	21.5284	2.84405	0.00204108
AMISG012983	RHAG	24.8478	65.7426	1.40371	0.0479451
AMISG012986	CRISP2	21.6846	236.824	3.44908	0.00204108
AMISG013101	TRPM5	1.49388	9.51834	2.67165	0.00204108
AMISG013202	AGXT-1	10.904	72.3052	2.72924	0.00204108
AMISG013323	LPO	0.8228	22.4115	4.76755	0.00356734
AMISG013357	LMX1AL	1.04686	16.767	4.00148	0.00713776
AMISG013433	MTUS2-1	0.735362	7.93239	3.43123	0.00604775
AMISG013545	XDH	2.72062	14.2317	2.3871	0.00487238
AMISG013583	HHIPL1	3.6228	14.9757	2.04745	0.00356734
AMISG013961	-	26.7098	102.948	1.94648	0.00204108
AMISG013992	COL19A1	0.642978	2.37625	1.88584	0.0487658
AMISG014041	HCRTR2-1	0	6.18754	0	0.00204108
AMISG014186	PRSS35	3.50502	12.4038	1.82328	0.0419301
AMISG014278	NBEAL1	2.39212	11.5279	2.26876	0.00204108
AMISG014280	WFDC12	62.2363	289.913	2.21979	0.00713776
AMISG014389	-	0.900923	4.62163	2.35892	0.0277031
AMISG014446	SVIL	11.1862	30.4823	1.44625	0.0288014
AMISG014518	GALNT11	15.0127	41.5772	1.46961	0.0466855
AMISG014855	APOA2	16.216	491.32	4.92117	0.00204108
AMISG014896	CLPS	0	11.936	0	0.00204108
AMISG014941	EPS8L3	6.37238	20.7253	1.70149	0.0499536
AMISG015086	DLK1	6.92586	24.8217	1.84154	0.0126421
AMISG015092	SLC25A47	3.81886	24.5189	2.68268	0.00356734
AMISG015166	-	1.50333	7.59693	2.33726	0.00913986
AMISG015350	SLC2A2	2.26181	16.8198	2.89461	0.0172186
AMISG015440	-	12.9303	76.3673	2.56219	0.0118067
AMISG015494	LONRF2L	19.8953	66.8121	1.74768	0.00713776
AMISG015529	TENM3	1.72321	5.3946	1.64642	0.0458427
AMISG015587	-	3.10298	28.5831	3.20344	0.00204108
AMISG015620	-	2.66611	17.1109	2.68211	0.00204108
AMISG015697	KLHL4	0.792485	3.44224	2.11889	0.0329831
AMISG015728	-	2.86834	14.1802	2.30559	0.037803
AMISG015756	CST6L	1.87127	25.2573	3.75461	0.00356734
AMISG015809	GSTA4	5.19575	31.5862	2.60389	0.00204108
AMISG015890	RASGRP1	3.94015	14.0463	1.83386	0.0164845
AMISG015904	-	6.79216	38.1109	2.48826	0.00204108
AMISG015992	PLA2G4F	1.92902	11.2587	2.5451	0.00204108
AMISG016221	SLAMF9	2.84669	27.779	3.28664	0.0100622
AMISG016370	-	2.89621	12.341	2.09122	0.0260507
AMISG016501	ITGB4	2.76076	8.93201	1.69392	0.0354479
AMISG016514	CDK3	3.79869	16.4516	2.11465	0.0499536
AMISG016766	STC1	5.53519	38.1331	2.78434	0.00204108
AMISG016873	TTC38	16.4007	46.2846	1.49678	0.0419301
AMISG017237	LMO7	1.29323	6.35005	2.29579	0.00487238
AMISG017455	-	2.52117	12.2197	2.27705	0.0218769
AMISG017631	-	2.46659	11.0155	2.15895	0.0109457
AMISG017690	ALOX5	1.29029	10.0788	2.96556	0.00204108
AMISG017713	KRT7	16.6618	218.692	3.71428	0.00204108
AMISG017916	NOV	7.14654	38.1037	2.41461	0.00487238
AMISG017964	ANGPT2-2	6.87218	19.2718	1.48765	0.0466855
AMISG018175	TMEM52B	27.3772	83.4936	1.60869	0.0314575
AMISG018185	-	0.19119	1.35986	2.83038	0.0199504
AMISG018272	G6PC	3.99779	14.9733	1.90512	0.0401211
AMISG018301	TMEM139	0.973528	7.68863	2.98143	0.0387373
AMISG018308	-	0.796476	3.09866	1.95994	0.0334893
AMISG018329	ACE	9.66041	31.7375	1.71603	0.00913986
AMISG018330	KCNH4	0.984658	28.2711	4.84356	0.00204108
AMISG018373	ARHGAP27	2.62727	10.3299	1.97519	0.0349672
AMISG018652	ADGRD1	4.83663	18.338	1.92277	0.00913986
AMISG018656	-	3.83739	23.4765	2.61302	0.0134561
AMISG018715	DAO	13.9534	76.931	2.46295	0.00204108
AMISG018909	FABP7	12.1743	92.1825	2.92065	0.0212344
AMISG018953	TMEM200A	5.78373	57.7951	3.32088	0.00204108
AMISG018988	MYB	4.24784	19.8865	2.22699	0.00356734
AMISG018994	PDE7B	5.4907	35.312	2.6851	0.00487238
AMISG019011	PERP2	8.74733	176.776	4.33694	0.00204108
AMISG019161	-	3.16367	24.2732	2.9397	0.00204108
AMISG019197	SCIN	33.0827	84.4796	1.35252	0.0354479
AMISG019314	RFTN1	17.2218	50.1942	1.54328	0.0298902
AMISG019420	MIOX	8.84459	62.543	2.82198	0.00204108
AMISG019471	ADH6	29.9608	149.546	2.31945	0.00356734
AMISG019520	MEPE	0.543021	10.4028	4.25983	0.00204108
AMISG019526	SPARCL1	6.29148	18.9971	1.59431	0.0349672
AMISG019660	-	0.812606	5.12786	2.65773	0.0483608
AMISG019661	SLC13A4	0.968047	6.02986	2.63898	0.00604775
AMISG019699	TES	42.684	132.359	1.63269	0.0237082
AMISG019793	RASSF3	8.49815	41	2.2704	0.00913986
AMISG019795	GNS	48.1268	230.98	2.26286	0.00204108
AMISG019797	WIF1	4.25837	135.759	4.99461	0.00204108
AMISG019872	PTPRQ	2.0773	9.70616	2.22419	0.0212344
AMISG019965	-	0	1.8782	0	0.00204108
AMISG020055	CYP2D6-1	7.7975	39.7069	2.34831	0.00204108
AMISG020068	GUCY2C	0.529705	3.2544	2.61913	0.0354479
AMISG020205	-	0.302057	6.12894	4.34275	0.00204108
AMISG020239	APOB	3.38495	14.1441	2.06299	0.0288014
AMISG020256	-	5.45876	19.5709	1.84206	0.0483608
AMISG020429	MCHR2L	5.46702	22.5878	2.04672	0.0288014
AMISG020653	-	0.438609	4.31818	3.29941	0.00913986
AMISG020832	VTG1	0.16878	6.94854	5.3635	0.0179141
AMISG020894	CTH	18.0672	53.6453	1.57008	0.0359217
AMISG020897	LRRC40	29.2225	102.252	1.80698	0.00604775
AMISG020904	DIRAS3	1.69921	12.4995	2.87894	0.0499536
AMISG020928	CACHD1	20.1034	57.4031	1.51369	0.0271527
AMISG020972	DNAI1	3.0807	11.8335	1.94155	0.0436786
AMISG020992	WNT2B	1.10997	6.33515	2.51286	0.0449682
AMISG021069	TMTC4	4.33748	22.9289	2.40224	0.00713776
AMISG021103	-	6.29093	25.1024	1.99648	0.00356734
AMISG021231	NKD1	2.29641	15.738	2.7768	0.00356734
AMISG021234	SALL3	10.2815	108.31	3.39703	0.00204108
AMISG021329	-	2.2802	11.8974	2.38341	0.0100622
AMISG021367	CPZ	18.3739	99.9376	2.44337	0.00204108
AMISG021542	UCHL1	109.942	312.626	1.50769	0.0391997
AMISG021711	VEGFC	12.7828	70.5296	2.46403	0.00204108
AMISG021767	SPOCK3	5.56384	25.107	2.17394	0.0142304
AMISG021821	FGB	0.709115	8.65529	3.60949	0.00713776
AMISG021868	-	33.4927	156.035	2.21995	0.00204108
AMISG021911	-	0	10.0296	0	0.0401211
AMISG022210	-	2.16757	13.7655	2.66691	0.0126421
AMISG022268	-	1.1038	9.80336	3.15079	0.0260507
AMISG022401	ARX	23.1426	107.465	2.21525	0.00204108
AMISG022429	MAP7D2	4.5735	15.7013	1.77952	0.0186027
AMISG022460	FIGF	4.0108	28.5252	2.83027	0.00204108
AMISG022479	FRMPD4	0.957344	3.5217	1.87916	0.0319616
AMISG022587	-	1.81756	9.44208	2.3771	0.00487238
AMISG022677	MOCOS	5.76804	17.8611	1.63066	0.0373357
AMISG022733	-	4.49638	18.0257	2.00322	0.0266267
AMISG022737	-	0.95388	7.27962	2.93198	0.0260507
AMISG022766	ANHX	0.295129	8.37099	4.82598	0.0458427
AMISG023009	-	0.542625	4.72937	3.12362	0.00713776
AMISG023033	PGR-1	0.865034	12.7132	3.87743	0.00604775
AMISG023056	TSPO	21.165	62.8107	1.56933	0.0401211
AMISG023172	CARD19-1	1.15077	5.76448	2.3246	0.0391997
AMISG023277	CLCNKB	13.5728	44.4178	1.71042	0.0126421
AMISG023439	CCDC3	10.7751	63.6498	2.56245	0.00204108
AMISG023489	-	0.246361	2.8201	3.5169	0.00204108
AMISG023492	-	36.9287	120.89	1.71088	0.0271527
AMISG023741	CFAP100	0.743295	8.72458	3.55308	0.00713776
AMISG023777	OXTR	1.14385	38.5953	5.07645	0.00204108
AMISG023803	-	2.05599	16.1523	2.97384	0.00204108
AMISG023852	-	2.81509	11.4593	2.02526	0.00816017
AMISG023875	FAM3D	4.57647	17.2656	1.91559	0.0458427
AMISG023931	-	0.368296	3.42721	3.21809	0.00816017
AMISG024291	-	0.52921	4.41566	3.06072	0.0319616
AMISG024336	PTPRO	1.27142	10.9714	3.10923	0.00204108
AMISG024390	LRMP	0.748527	2.44867	1.70987	0.0445481
AMISG024467	PXYLP1	16.0852	46.4593	1.53023	0.0428157
AMISG024640	-	2.01055	23.3219	3.53602	0.00204108
AMISG024680	CALB1	52.8638	216.28	2.03255	0.00604775

## Sheet: Gonad 30d Male-biased
Gene ID	Gene symbol	Mean male expression (FPKM)	Mean female expression (FPKM)	Log2 fold change	FDR-adjusted p-value
AMISG000024	TSPAN7	84.9445	22.7113	-1.90311	0.00487238
AMISG000422	-	49.8063	11.8505	-2.07138	0.00713776
AMISG000472	MDK	3493.61	959.493	-1.86437	0.0142304
AMISG000502	TTC17	54.1632	19.8941	-1.44497	0.0199504
AMISG000527	PAMR1-1	117.436	13.4064	-3.13089	0.00204108
AMISG000561	DHCR7	145.992	33.9983	-2.10236	0.00204108
AMISG000576	GAS2	80.4713	14.6076	-2.46176	0.00204108
AMISG000633	-	152.009	14.0594	-3.43456	0.00204108
AMISG000643	-	75.7322	19.4413	-1.96178	0.0243004
AMISG000645	DKK3	553.684	113.792	-2.28267	0.00204108
AMISG000670	NRIP3	92.2024	20.855	-2.14441	0.00204108
AMISG000677	-	76.695	24.5516	-1.64332	0.0109457
AMISG000750	-	28.4855	5.52531	-2.3661	0.00356734
AMISG000807	-	17.3548	4.824	-1.84703	0.00356734
AMISG000863	-	13.1806	1.76843	-2.89787	0.00204108
AMISG000864	CLEC18A	220.222	18.6128	-3.56459	0.00204108
AMISG000951	RBP4B	25.5433	3.84578	-2.7316	0.0288014
AMISG001056	SUN3	1.3139	0.235359	-2.48092	0.0142304
AMISG001106	SERPINH1	610.39	208.212	-1.55168	0.0445481
AMISG001157	CALR	2284.3	537.692	-2.0869	0.0142304
AMISG001231	PRSS12	11.2937	2.11162	-2.4191	0.00356734
AMISG001278	SMAD6	146.851	44.0879	-1.7359	0.00487238
AMISG001304	RASL12	27.7308	1.51023	-4.19865	0.00487238
AMISG001307	KBTBD13	4.35116	0.426003	-3.35246	0.045404
AMISG001478	TMOD3	35.1447	7.4171	-2.24438	0.00356734
AMISG001479	-	82.6916	26.7732	-1.62695	0.0387373
AMISG001484	-	18.1479	0	0	0.0391997
AMISG001635	CHRNA7	50.5838	6.27252	-3.01156	0.00204108
AMISG001642	FAM63B	17.8702	4.15576	-2.10437	0.0205944
AMISG001691	-	5.10068	0	0	0.0441196
AMISG001765	SCD	77.9283	17.6454	-2.14286	0.00604775
AMISG001786	-	52.3045	11.8258	-2.14499	0.00204108
AMISG001790	GDF10	27.2812	6.09237	-2.16283	0.00356734
AMISG001924	SDC3-1	61.3615	21.7248	-1.49799	0.0224934
AMISG001960	XKR8	14.2312	3.25718	-2.12736	0.0179141
AMISG002004	MYLIP	34.3782	9.12784	-1.91315	0.0118067
AMISG002052	CFI	176.137	39.677	-2.15032	0.00204108
AMISG002115	-	16.173	2.34653	-2.78499	0.00356734
AMISG002126	-	48.8116	10.9301	-2.15892	0.00204108
AMISG002190	-	41.8892	13.7249	-1.60978	0.0309463
AMISG002278	AHSA2	30.8198	1.06832	-4.85044	0.00204108
AMISG002343	-	26.5825	9.71766	-1.4518	0.0462558
AMISG002361	-	73.5229	23.0324	-1.67453	0.0126421
AMISG002425	MICAL3	40.5608	4.37359	-3.21319	0.00204108
AMISG002517	-	21.5438	7.32645	-1.55609	0.0387373
AMISG002601	-	2.01773	0	0	0.0359217
AMISG002617	CHRNA2	4.84557	0.622688	-2.96009	0.0164845
AMISG002635	COL9A3	19.6899	0.885133	-4.47542	0.00204108
AMISG002638	SLCO4A1	42.1619	4.95555	-3.08882	0.00204108
AMISG002721	BCAS1	67.9637	1.24588	-5.76953	0.00204108
AMISG002767	-	12.5441	2.91441	-2.10573	0.0126421
AMISG002796	MATN4	510.363	14.3384	-5.15357	0.00204108
AMISG002797	RBPJL	13.1151	2.09452	-2.64654	0.00204108
AMISG002821	-	4.69522	1.17011	-2.00454	0.0282469
AMISG002825	ARHGAP28-1	39.7284	4.22821	-3.23205	0.00204108
AMISG002837	-	26.795	6.42854	-2.0594	0.00487238
AMISG002927	PEX5	65.42	24.6035	-1.41087	0.0475258
AMISG002929	-	2.92603	0	0	0.0199504
AMISG002942	COL8A1	8.49361	0.769281	-3.4648	0.0118067
AMISG003047	PHLDB2	56.9464	17.6722	-1.68812	0.0368661
AMISG003058	MORC1	22.8831	3.06279	-2.90136	0.00204108
AMISG003059	MORC1L	81.11	11.2557	-2.84922	0.00204108
AMISG003087	NFKBIZ	15.95	4.48857	-1.82922	0.0419301
AMISG003199	-	216.741	45.0777	-2.26549	0.00204108
AMISG003226	JAM2	2151.05	55.0372	-5.28849	0.00204108
AMISG003329	-	32.1639	7.91727	-2.02237	0.00356734
AMISG003331	RIPK4	13.8799	3.94971	-1.81318	0.0445481
AMISG003596	TESK2	14.4183	4.9002	-1.55699	0.0475258
AMISG003666	CALB2	413.662	107.414	-1.94527	0.00204108
AMISG003667	PNPL	2.60901	0	0	0.00204108
AMISG003678	FA2H	7.60726	1.20129	-2.66279	0.0271527
AMISG003812	CA8	73.2966	9.65029	-2.9251	0.00487238
AMISG003873	-	11.3038	4.1021	-1.46237	0.0483608
AMISG003960	SERINC5	102.05	10.2141	-3.32065	0.00204108
AMISG003997	FAM169A	17.8855	5.38296	-1.73232	0.0396667
AMISG004002	-	35.1207	8.41149	-2.06189	0.00487238
AMISG004144	-	15.6785	0	0	0.00204108
AMISG004186	CDO1	173.925	18.8647	-3.20471	0.00204108
AMISG004219	-	2.15484	0.654252	-1.71966	0.0410227
AMISG004371	-	6.41093	0	0	0.0134561
AMISG004380	METTL11B	3.84342	0	0	0.00204108
AMISG004414	-	23.5885	5.5762	-2.08073	0.0237082
AMISG004470	-	34.5976	10.2725	-1.75188	0.0172186
AMISG004532	-	12.137	0	0	0.0396667
AMISG004533	-	6.48363	0	0	0.00204108
AMISG004565	-	82.3802	23.7473	-1.79454	0.0164845
AMISG004621	-	11.2055	0	0	0.0419301
AMISG004797	CCNRC01	7.25376	0.203573	-5.15511	0.0118067
AMISG004812	CD14	47.2692	2.86003	-4.0468	0.00204108
AMISG004813	-	64.9613	0	0	0.00204108
AMISG004814	-	9.17082	0.334547	-4.77677	0.00204108
AMISG004817	APBB3	17.7568	3.15301	-2.49357	0.00356734
AMISG004957	SPR	108.949	36.2337	-1.58825	0.0254788
AMISG005247	-	8.34317	0	0	0.00487238
AMISG005445	HYAL1	15.027	4.02713	-1.89973	0.0260507
AMISG005550	RABL6	125.181	37.4631	-1.74047	0.0100622
AMISG005566	-	30.4338	3.80036	-3.00146	0.00204108
AMISG005623	-	43.6987	15.0645	-1.53643	0.0475258
AMISG005708	AIF1L	489.102	82.5602	-2.56662	0.00204108
AMISG005867	-	18.739	4.96089	-1.91738	0.0186027
AMISG005976	PLTP	152.363	9.84956	-3.95131	0.00204108
AMISG006074	NMNAT1-1	14.8348	3.33116	-2.15489	0.0382801
AMISG006075	LZIC	263.653	65.2209	-2.01523	0.0100622
AMISG006102	AGRN	17.7397	6.45271	-1.45901	0.0359217
AMISG006177	GRTP1	110.565	12.1229	-3.18908	0.00204108
AMISG006198	-	207.695	48.061	-2.11152	0.00204108
AMISG006224	-	75.0236	23.3759	-1.68232	0.0237082
AMISG006237	CHST10-1	74.4783	19.3295	-1.94602	0.0100622
AMISG006279	NIPA1	49.7788	2.94881	-4.07733	0.00204108
AMISG006308	PDDC1-1	102.401	37.5064	-1.44902	0.0401211
AMISG006325	-	148.854	40.436	-1.88018	0.0373357
AMISG006401	SYT7	68.2101	9.26113	-2.88073	0.00204108
AMISG006414	-	6.39199	0	0	0.00204108
AMISG006511	CNN1	46.1343	7.49313	-2.6222	0.00204108
AMISG006523	TBX15	4.32385	0.838554	-2.36634	0.0149937
AMISG006550	-	126.273	16.6966	-2.91892	0.00204108
AMISG006953	SHISA5	128.632	44.1719	-1.54205	0.0495673
AMISG006962	NOL8	59.3887	19.6597	-1.59495	0.0243004
AMISG007093	PSPH	66.7776	10.0933	-2.72596	0.00204108
AMISG007104	LRRC75A	71.7159	17.5245	-2.03292	0.00913986
AMISG007130	-	52.395	8.53928	-2.61724	0.00204108
AMISG007210	YPEL2	14.3285	2.12053	-2.75639	0.0423695
AMISG007260	PLP1-1	850.159	8.02597	-6.72691	0.00204108
AMISG007270	-	14.9834	2.54653	-2.55676	0.00816017
AMISG007272	TMEM35	149.539	35.8081	-2.06217	0.00487238
AMISG007283	TNMD	274.673	67.5386	-2.02393	0.00356734
AMISG007358	KCTD12L	184.352	61.5735	-1.58208	0.0266267
AMISG007392	FAAH2	48.6037	16.7037	-1.5409	0.0282469
AMISG007408	-	58.953	12.2502	-2.26676	0.00204108
AMISG007469	VCAM1	437.783	16.4471	-4.73431	0.00204108
AMISG007509	-	13.7468	0.7518	-4.1926	0.00204108
AMISG007751	-	14.0384	0	0	0.00204108
AMISG007789	-	12.2645	3.3847	-1.85739	0.0363893
AMISG007879	-	150.34	33.8531	-2.15087	0.00204108
AMISG008007	-	77.6865	19.045	-2.02825	0.00204108
AMISG008036	RNF144B	30.8611	5.77875	-2.41696	0.00204108
AMISG008058	SLC22A23	6.7201	1.57033	-2.09742	0.0134561
AMISG008087	-	15.2545	0.359835	-5.40575	0.00487238
AMISG008295	-	117.677	41.281	-1.51128	0.0254788
AMISG008329	TTYH3	43.8339	14.6345	-1.58267	0.0382801
AMISG008521	FBLN7	60.3437	5.96231	-3.33926	0.00204108
AMISG008534	-	93.6091	6.07138	-3.94655	0.0134561
AMISG008536	-	81.9875	6.19218	-3.72688	0.00204108
AMISG008757	COL18A1	334.691	83.2142	-2.00793	0.0231024
AMISG008792	-	9.73732	2.9522	-1.72174	0.0218769
AMISG008819	TMEFF2	71.0992	12.6499	-2.49071	0.00204108
AMISG008821	SDPR	309.6	56.0098	-2.46666	0.00204108
AMISG008827	-	5.89279	1.21803	-2.2744	0.0118067
AMISG008828	-	29.0649	10.1928	-1.51172	0.0487658
AMISG008908	NPC2	648.745	225.138	-1.52684	0.0354479
AMISG009000	-	70.3282	20.7304	-1.76235	0.00713776
AMISG009020	CLU	601.218	178.935	-1.74845	0.0405744
AMISG009021	SCARA3	14.1806	1.91202	-2.89075	0.0218769
AMISG009037	-	32.5152	5.24817	-2.63123	0.00204108
AMISG009216	RHOU	14.9767	3.8151	-1.97292	0.0271527
AMISG009586	GPAM	104.681	16.0437	-2.70592	0.00204108
AMISG009733	SMAD7	46.719	6.51437	-2.84231	0.00204108
AMISG009737	LIPG	34.3656	2.45793	-3.80545	0.00204108
AMISG010059	SLC27A5	15.7495	3.56105	-2.14494	0.0475258
AMISG010111	COL11A1	39.0095	12.5633	-1.63461	0.0172186
AMISG010113	-	3.55795	0.549513	-2.69482	0.0401211
AMISG010115	AMY2A	17.3655	1.56682	-3.47031	0.00356734
AMISG010301	MAF	51.8908	14.0979	-1.88	0.0109457
AMISG010402	SMAD5	4.34824	0.508769	-3.09535	0.0126421
AMISG010415	SIGMAR1	444.832	75.0841	-2.56668	0.00204108
AMISG010505	-	1.68046	0	0	0.0363893
AMISG010624	KHNYN	43.7231	10.4564	-2.06401	0.00204108
AMISG010628	EIF4A3	536.435	113.331	-2.24286	0.00204108
AMISG010676	NCEH1	47.3413	10.5477	-2.16617	0.00356734
AMISG010724	-	110.028	35.7863	-1.62039	0.0118067
AMISG010739	SH3TC2	18.7352	6.51448	-1.52403	0.0354479
AMISG010810	ACSL6	26.9839	0.602	-5.48619	0.00204108
AMISG010820	TCF7	14.8342	3.20442	-2.21079	0.0277031
AMISG010939	NIPAL4	2.5707	0	0	0.00204108
AMISG010996	-	24.4676	9.06092	-1.43314	0.0314575
AMISG011004	CACNG7	135.871	17.0573	-2.99377	0.00204108
AMISG011028	TTYH1	121.435	5.42556	-4.48427	0.00204108
AMISG011034	-	11.4959	2.57087	-2.16079	0.0149937
AMISG011132	ADAM15	1.99503	0.30173	-2.72509	0.0142304
AMISG011287	ID2	547.235	160.236	-1.77197	0.0186027
AMISG011341	MYCN	184.55	51.5847	-1.83899	0.00204108
AMISG011422	INHA	102.2	0.681394	-7.2287	0.0334893
AMISG011437	FRZB	195.615	8.62554	-4.50326	0.00204108
AMISG011546	STK39	24.4195	5.36516	-2.18634	0.0199504
AMISG011571	IFIH1	26.7346	8.29719	-1.68802	0.0118067
AMISG011613	-	2.98499	0	0	0.0396667
AMISG011691	NCKAP5	30.0548	3.8705	-2.957	0.0118067
AMISG011692	LYPD1	60.7809	5.71572	-3.41061	0.0100622
AMISG011693	GPR39	33.6562	3.70284	-3.18417	0.00204108
AMISG011741	MYLK	31.2221	9.33236	-1.74225	0.00604775
AMISG011765	-	9.2931	0	0	0.0423695
AMISG011767	-	103.843	10.4979	-3.30622	0.00356734
AMISG011866	GPX3	469.941	28.7892	-4.02888	0.00204108
AMISG012001	AMH	10830.3	6.38228	-10.7287	0.00204108
AMISG012036	ERBB2	64.6489	13.2015	-2.29192	0.00204108
AMISG012038	PNMT	543.251	82.506	-2.71905	0.00356734
AMISG012421	NR5A2	175.408	53.4871	-1.71345	0.0205944
AMISG012456	DMXL2	20.2506	7.24592	-1.48272	0.0387373
AMISG012504	-	62.216	16.9946	-1.87221	0.0149937
AMISG012532	ROR1L	10.5554	2.32438	-2.18307	0.0142304
AMISG012543	SEMA4D	60.3628	16.4571	-1.87495	0.00356734
AMISG012618	-	47.4238	11.1098	-2.09378	0.00204108
AMISG012621	PSAT1	358.197	47.3886	-2.91814	0.00204108
AMISG012654	TRPM1A	17.547	0.290959	-5.91427	0.00204108
AMISG012675	DMRT1	176.536	23.9914	-2.87937	0.00204108
AMISG012693	RLN1	85.9655	9.62497	-3.15891	0.00204108
AMISG012849	OAT	233.9	83.3617	-1.48844	0.0224934
AMISG013074	-	4.81853	0	0	0.00204108
AMISG013205	SNED1	98.9083	27.6362	-1.83953	0.00204108
AMISG013240	-	55.1214	0	0	0.00204108
AMISG013376	PIK3R6	17.5189	1.42416	-3.62073	0.00204108
AMISG013378	-	6.45475	1.12595	-2.51922	0.0354479
AMISG013381	USP43	16.7302	2.02791	-3.04439	0.00204108
AMISG013475	SLC29A1	563.939	93.5633	-2.59152	0.00204108
AMISG013507	KCNK17	12.4848	1.26176	-3.30667	0.0149937
AMISG013569	DEGS1	217.076	48.6203	-2.15857	0.00204108
AMISG013823	OCRL	81.5404	27.7565	-1.55469	0.0224934
AMISG013991	COL9A1	161.339	0.434277	-8.53726	0.00204108
AMISG014035	-	32.1155	9.76748	-1.71721	0.0172186
AMISG014049	ELOVL5	202.183	64.0083	-1.65933	0.0149937
AMISG014051	GCM1	15.1975	0.884034	-4.10359	0.00204108
AMISG014108	FARP2	13.2914	4.10658	-1.69448	0.0254788
AMISG014180	MRAP2	65.8412	7.68816	-3.09828	0.00204108
AMISG014236	-	715.905	53.3788	-3.74543	0.00487238
AMISG014254	GJC2	49.6155	13.429	-1.88544	0.0109457
AMISG014438	-	29.8665	0	0	0.00204108
AMISG014495	PTPRN2	6.93473	1.02033	-2.7648	0.0231024
AMISG014512	-	37.9776	14.3455	-1.40455	0.0359217
AMISG014797	SYNE2	118.557	9.13116	-3.69864	0.00204108
AMISG014798	SYNE1	998.737	68.7994	-3.85964	0.00204108
AMISG014888	-	116.655	11.9168	-3.29118	0.00204108
AMISG014910	MTCH1	72.8327	23.6191	-1.62463	0.0237082
AMISG014943	-	3316.97	846.976	-1.96947	0.0179141
AMISG015001	GPR37L1	34.9934	7.52771	-2.2168	0.00204108
AMISG015038	CYP2C8	14.0815	2.13112	-2.72412	0.00204108
AMISG015113	-	1.78367	0	0	0.0309463
AMISG015146	CHGA	241.666	64.8908	-1.89693	0.0354479
AMISG015354	CLDN11	1345.14	260.896	-2.36621	0.00204108
AMISG015400	AHRR	6.13644	1.06257	-2.52984	0.0243004
AMISG015462	-	17.4123	1.55015	-3.48963	0.00204108
AMISG015465	DSP	186.064	41.8032	-2.15412	0.0100622
AMISG015579	RASL11AL	59.3039	11.7542	-2.33495	0.00204108
AMISG016096	SNAPC3	66.0274	26.1893	-1.33409	0.0462558
AMISG016116	-	18.7078	5.36525	-1.80192	0.00713776
AMISG016119	PLIN2	327.113	83.5381	-1.96928	0.00204108
AMISG016141	OASL	46.0861	16.7677	-1.45865	0.0314575
AMISG016200	-	7.6643	1.28827	-2.57272	0.00204108
AMISG016205	ANKH	74.4874	17.8952	-2.05742	0.00356734
AMISG016210	-	5.56405	0	0	0.00204108
AMISG016296	HDAC3	175.058	62.1827	-1.49324	0.0319616
AMISG016326	SOX9	90.8898	2.39124	-5.24829	0.00204108
AMISG016405	PCTP	37.3249	2.27702	-4.03492	0.0109457
AMISG016406	TMEM100	107.411	21.9508	-2.29079	0.0118067
AMISG016411	MMD-1	49.7581	15.1884	-1.71196	0.0423695
AMISG016469	GRIN2B	2.914	0.374731	-2.95907	0.00204108
AMISG016472	USH1G	3.67557	0.342494	-3.42382	0.045404
AMISG016487	GGA1L	32.7206	11.1779	-1.54955	0.0186027
AMISG016642	MET	35.6442	6.66215	-2.41961	0.00204108
AMISG016669	EXTL3	104.891	40.2056	-1.38343	0.0363893
AMISG016752	-	206.303	49.9282	-2.04684	0.00204108
AMISG016767	NKX2-6	18.7354	1.69334	-3.46782	0.00816017
AMISG016768	NKX3-1-1	18.2529	4.22224	-2.11205	0.0363893
AMISG016803	NRIP2	24.1925	1.337	-4.17749	0.00816017
AMISG016833	NTF3-1	25.4574	4.86445	-2.38774	0.0282469
AMISG016834	-	4.35293	1.24406	-1.80692	0.0495673
AMISG016841	APOBEC1A	16.1597	2.48482	-2.70118	0.0304148
AMISG016867	-	24.4182	6.63294	-1.88024	0.00913986
AMISG017077	TAP2	5.34605	0	0	0.00204108
AMISG017148	-	433.374	64.3729	-2.75109	0.0237082
AMISG017197	-	4.82767	0	0	0.0126421
AMISG017299	-	2.95214	0	0	0.0142304
AMISG017306	SCN4B	137.188	33.7797	-2.02193	0.00816017
AMISG017343	CYP4F22	71.7479	4.25658	-4.07517	0.00204108
AMISG017417	MPZL2	494.547	20.451	-4.59586	0.00204108
AMISG017462	-	26.5592	0	0	0.00204108
AMISG017480	PDIA4	631.374	234.91	-1.42639	0.0441196
AMISG017541	EEPD1	16.4308	4.83212	-1.76567	0.0142304
AMISG017608	CLEC3B	366.446	27.1985	-3.752	0.00204108
AMISG017915	ENPP2	1118.41	241.161	-2.21338	0.0277031
AMISG017997	-	8.44655	1.02935	-3.03663	0.00487238
AMISG018028	SDC2	671.219	252.483	-1.41059	0.0410227
AMISG018100	TACC1	33.6398	10.4504	-1.6866	0.00816017
AMISG018186	-	112.057	14.1188	-2.98854	0.00204108
AMISG018187	-	169.023	24.5449	-2.78373	0.00204108
AMISG018287	-	47.243	0	0	0.00204108
AMISG018430	-	273.524	103.817	-1.39762	0.0458427
AMISG018442	KRT14	91.1042	0.771806	-6.88313	0.00204108
AMISG018443	-	111.707	1.61604	-6.11111	0.00204108
AMISG018444	-	17.81	3.01513	-2.56239	0.0359217
AMISG018451	KRT19	49.4664	2.03592	-4.60269	0.00204108
AMISG018567	ANKRD29	10.4686	1.38708	-2.91594	0.0192798
AMISG018580	-	276.853	59.3242	-2.22243	0.00604775
AMISG018799	SLC16A8	8.89267	2.49981	-1.8308	0.0462558
AMISG018875	FAM162B	96.7558	26.0269	-1.89434	0.0441196
AMISG018947	LAMA1	53.2557	14.873	-1.84024	0.00204108
AMISG019081	NUP153-1	78.7436	18.1794	-2.11486	0.00204108
AMISG019102	ACBD7	2851.95	852.761	-1.74173	0.00913986
AMISG019259	NPY	98.1234	10.0481	-3.28767	0.00487238
AMISG019301	SCRN1	275.694	40.7196	-2.75927	0.00204108
AMISG019404	SH3BP5	157.435	25.1867	-2.64402	0.00204108
AMISG019514	HERC5	7.29675	2.39958	-1.60447	0.0445481
AMISG019667	PTPRZ1	94.0474	9.65386	-3.28421	0.00204108
AMISG019734	CNTN2	53.656	9.55297	-2.48972	0.00204108
AMISG019762	SLC38A2	70.8829	21.6788	-1.70915	0.0231024
AMISG019840	RAB21	218.319	67.1023	-1.702	0.00713776
AMISG019864	-	3.76074	1.02693	-1.87267	0.034486
AMISG020219	GCFC2-1	32.185	11.657	-1.46519	0.0309463
AMISG020379	ABCA3	75.8705	28.668	-1.4041	0.0471124
AMISG020388	-	14.6943	5.03994	-1.54378	0.0224934
AMISG020406	NME3	75.8548	23.1615	-1.71151	0.0172186
AMISG020646	SETD7	20.7952	2.21335	-3.23195	0.00913986
AMISG020648	MAML3	51.3077	11.7299	-2.12898	0.00487238
AMISG020820	CLCA2	17.6095	0.794189	-4.47073	0.0199504
AMISG020821	ODF2L-1	5.95332	1.21838	-2.28873	0.0432549
AMISG020824	CYR61	175.265	24.2626	-2.85274	0.00204108
AMISG020831	-	44.3379	2.87752	-3.94564	0.00604775
AMISG020834	CTBS	14.5671	3.626	-2.00626	0.00204108
AMISG020867	AK5	84.6321	31.4102	-1.42997	0.0419301
AMISG020903	WLS	269.089	105.092	-1.35643	0.0428157
AMISG020987	FAM212B	31.8333	5.15034	-2.6278	0.00204108
AMISG021026	STON2	14.1929	2.89706	-2.29251	0.00487238
AMISG021044	SPTLC3	30.4088	10.7468	-1.50058	0.0499536
AMISG021259	LPCAT2	47.3035	12.5261	-1.91701	0.0134561
AMISG021283	RPIA	242.793	73.9514	-1.71508	0.00816017
AMISG021612	-	5.90792	1.16763	-2.33906	0.0179141
AMISG021672	ANKRD37	26.695	6.14289	-2.11958	0.0164845
AMISG021685	ENPP6	26.3883	5.16005	-2.35444	0.0118067
AMISG021738	SCRG1	191.196	1.75186	-6.77002	0.0282469
AMISG021773	CPE	361.079	38.5319	-3.22819	0.00204108
AMISG021774	MSMO1	209.627	29.3598	-2.83591	0.00204108
AMISG021776	-	28.2306	9.44745	-1.57926	0.0405744
AMISG021781	TMA16	151.923	47.1324	-1.68855	0.0266267
AMISG021908	-	30.7901	7.23649	-2.08911	0.00204108
AMISG021971	-	20.4859	6.18423	-1.72796	0.0277031
AMISG022045	ADGRG6	20.4071	3.02345	-2.7548	0.0100622
AMISG022051	CFHR2	167.088	12.7556	-3.71141	0.00204108
AMISG022052	KCNT2	2.62075	0.455802	-2.5235	0.0324731
AMISG022079	SLITRK6	2.74139	0.36109	-2.92448	0.0212344
AMISG022096	FHOD1-1	20.7263	1.90134	-3.44637	0.00204108
AMISG022200	LIPA	127.589	44.0799	-1.53332	0.0237082
AMISG022262	NPFFR1	15.3724	4.02514	-1.93323	0.0254788
AMISG022421	SMS	303.196	100.484	-1.59329	0.0205944
AMISG022465	MOSPD2	67.8489	17.4625	-1.95806	0.00604775
AMISG022466	FANCB	25.9031	6.90624	-1.90715	0.00604775
AMISG022471	GPM6B-1	300.97	103.732	-1.53676	0.0483608
AMISG022499	-	8.1616	0	0	0.0293426
AMISG022557	-	22.3668	5.19355	-2.10657	0.0192798
AMISG022577	GLB1L2	141.738	44.5791	-1.66879	0.00356734
AMISG022601	SORL1	108.32	9.43328	-3.5214	0.00204108
AMISG022628	CD5L	14.9907	1.62535	-3.20525	0.0134561
AMISG022662	ZDHHC11	44.4113	0.65026	-6.09377	0.00204108
AMISG022669	PLEKHG4B	43.4921	13.0199	-1.74004	0.0179141
AMISG022759	RAB36-1	43.3614	7.28226	-2.57395	0.00356734
AMISG022808	CIT	18.5995	6.72321	-1.46804	0.0334893
AMISG022889	GAL3ST1	19.3946	3.1578	-2.61866	0.00356734
AMISG022915	MDC1	49.6499	18.7771	-1.40282	0.0368661
AMISG023040	-	24.4805	0.50345	-5.60364	0.00204108
AMISG023047	-	10.4887	0.705639	-3.89376	0.00204108
AMISG023152	LRTM1	93.1575	16.3885	-2.50699	0.00604775
AMISG023182	PTPDC1-1	16.1744	4.06406	-1.99272	0.0186027
AMISG023220	EFHD2	173.254	6.97495	-4.63456	0.00204108
AMISG023272	ARHGEF19	8.11879	0.209962	-5.27307	0.00913986
AMISG023274	-	6.9034	1.30379	-2.4046	0.00604775
AMISG023413	-	32.0693	9.97726	-1.68448	0.0271527
AMISG023450	USP6NL	34.905	9.31238	-1.90621	0.00816017
AMISG023524	-	62.2341	9.17864	-2.76135	0.00204108
AMISG023610	TRIT1	199.052	67.7312	-1.55525	0.0199504
AMISG023620	-	17.3942	5.54506	-1.64933	0.0149937
AMISG023696	PRELP	103.745	31.7838	-1.70668	0.00604775
AMISG023724	EEFSEC	109.218	39.1541	-1.47997	0.0254788
AMISG023744	NTN4	48.9908	9.73087	-2.33187	0.0368661
AMISG023805	-	3.37402	0.277125	-3.60586	0.00604775
AMISG023918	-	30.5041	4.46849	-2.77115	0.00204108
AMISG024058	GRAP2	6.3786	0.820917	-2.95793	0.0368661
AMISG024162	BPIFCB	10.2713	0.353686	-4.86001	0.0118067
AMISG024190	-	1293.81	404.101	-1.67883	0.037803
AMISG024248	PTN	2913.16	485.566	-2.58484	0.00204108
AMISG024268	-	22.4617	6.10677	-1.87899	0.0243004
AMISG024287	-	9.32074	0.414563	-4.49078	0.00204108
AMISG024303	ADIPOR2	57.7846	21.9296	-1.39781	0.034486
AMISG024319	-	15.3033	4.25774	-1.84568	0.0334893
AMISG024337	EPS8	45.1841	15.1517	-1.57633	0.0314575
AMISG024354	PLEKHA5	34.6067	11.8152	-1.5504	0.0432549
AMISG024470	-	17.8557	3.74974	-2.25152	0.00204108
AMISG024483	GUCY1B4	1.92589	0.231593	-3.05586	0.0462558
AMISG024525	PLS1	23.496	4.77671	-2.29833	0.00356734
AMISG024557	WWTR1	84.7964	31.3551	-1.4353	0.0495673
AMISG024577	-	13.3276	0.886611	-3.90997	0.00204108
AMISG024643	BCHE	139.689	9.45235	-3.8854	0.00204108

## Sheet: Gonad 3d Female-biased
Gene ID	Gene symbol	Mean male expression (FPKM)	Mean female expression (FPKM)	Log2 fold change	FDR-adjusted p-value
AMISG000488	PRDM11	4.74822	13.8443	1.54384	0.0487658
AMISG000987	-	3.033	11.6724	1.94428	0.0192798
AMISG001334	-	2.96999	10.2452	1.78642	0.0109457
AMISG002127	-	5.72166	38.1982	2.739	0.0487658
AMISG002730	NFATC1L	0.537606	3.04163	2.50022	0.0218769
AMISG003210	-	3.95386	11.916	1.59157	0.0304148
AMISG003781	VCPIP1	0.59668	2.64026	2.14565	0.0462558
AMISG004119	-	3.50523	11.4248	1.70459	0.0428157
AMISG004218	-	0	8.09319	0	0.0205944
AMISG004219	-	3.37305	9.27509	1.45931	0.0266267
AMISG004350	RC3H2	2.10974	8.0879	1.9387	0.0288014
AMISG004740	-	2.37916	6.37203	1.4213	0.0445481
AMISG004885	-	2.706	13.4875	2.31738	0.0277031
AMISG004942	ATRNL1	4.05473	11.4327	1.49549	0.0423695
AMISG005325	-	1.59896	5.35528	1.74382	0.0436786
AMISG005794	NACC2	1.4735	4.70481	1.67489	0.0458427
AMISG006240	AFF3	0.641221	2.12055	1.72554	0.0382801
AMISG006725	-	1.9651	6.29551	1.67972	0.0419301
AMISG007151	NF1	4.58098	13.2403	1.5312	0.0157388
AMISG007942	DOK6	2.06177	9.42965	2.19332	0.0282469
AMISG008189	MKL2	4.46361	13.639	1.61146	0.0271527
AMISG008279	LMTK2	1.37416	4.23647	1.62431	0.0387373
AMISG008621	BMPR2	5.4801	17.7733	1.69743	0.0192798
AMISG008803	PGAP1	1.22234	4.57666	1.90466	0.0224934
AMISG009400	AFF2	1.44095	5.05145	1.80968	0.0449682
AMISG009721	ST8SIA5	2.2134	10.1967	2.20376	0.0410227
AMISG009837	LIFR	2.12249	8.27466	1.96294	0.0157388
AMISG010213	CDON	20.042	50.0867	1.3214	0.0483608
AMISG010793	AFF1L	3.43963	9.37166	1.44605	0.0391997
AMISG011747	SEMA5A	3.00648	10.6674	1.82707	0.0199504
AMISG011919	LMNB1	10.0946	40.0448	1.98803	0.0179141
AMISG012117	IGF2BP3	3.02568	13.2589	2.13163	0.00816017
AMISG012124	NGFR	10.7528	31.4	1.54606	0.0282469
AMISG012926	SESN1	2.20063	9.6298	2.12959	0.0109457
AMISG013510	DAAM2	3.86633	12.2508	1.66384	0.00913986
AMISG013622	PTPN14	1.6538	9.19439	2.47497	0.00204108
AMISG014033	DST	0.95887	4.04557	2.07694	0.0157388
AMISG014135	BACH2	1.14067	4.97425	2.1246	0.0282469
AMISG014138	MDN1	0.808757	6.13347	2.92293	0.0157388
AMISG014207	PHIP	2.60943	7.75648	1.57167	0.037803
AMISG014501	LMBR1	4.69423	16.773	1.83718	0.0304148
AMISG014528	-	1.54169	7.96349	2.36889	0.00356734
AMISG014694	AGO2	1.23881	4.50099	1.86129	0.0324731
AMISG014797	SYNE2	1.96634	6.60089	1.74715	0.0157388
AMISG014829	CEP170B	3.31025	8.67998	1.39075	0.0423695
AMISG015118	DICER1	4.05311	12.3219	1.60413	0.0298902
AMISG015186	-	0.908711	2.95828	1.70287	0.0458427
AMISG015586	-	9.47953	25.1822	1.40952	0.0382801
AMISG015588	AMER1	0.96182	4.11488	2.09701	0.00356734
AMISG016671	HMBOX1	3.80501	13.9284	1.87205	0.0363893
AMISG017249	EDNRB	14.2188	45.4702	1.67712	0.0186027
AMISG017467	-	4.57262	14.8571	1.70007	0.0495673
AMISG018667	-	3.48314	11.3936	1.70977	0.0373357
AMISG019012	ARFGEF3	0.887611	3.54906	1.99944	0.0231024
AMISG019097	ITGAV	11.5915	29.5168	1.34847	0.0319616
AMISG019295	CREB5	1.02794	4.16858	2.01981	0.0499536
AMISG019786	SRGAP2	3.52966	10.5424	1.57861	0.0277031
AMISG020656	RNF150	2.5253	8.9162	1.81998	0.0359217
AMISG021549	-	2.86927	10.6369	1.89032	0.0243004
AMISG021646	ASAH1	16.8855	45.2684	1.42272	0.0387373
AMISG021656	FAT3A	1.70971	9.34672	2.45071	0.00356734
AMISG021877	CLSTN3	1.55196	7.20832	2.21557	0.00604775
AMISG021990	ESR1	3.33548	15.5473	2.2207	0.00487238
AMISG022175	PLCE1	1.92379	5.08929	1.40351	0.0479451
AMISG022420	PHEX	11.8925	35.6562	1.58409	0.0479451
AMISG022651	-	3.81914	13.6772	1.84046	0.0271527
AMISG022949	-	1.18798	5.61724	2.24135	0.00204108
AMISG023139	APPL1	4.89299	14.941	1.61049	0.0186027
AMISG023193	IQSEC3	5.10571	14.9361	1.54862	0.0475258
AMISG023413	-	9.19143	28.8352	1.64947	0.0109457
AMISG024523	XRN1	6.16124	16.6461	1.43389	0.0405744
AMISG024630	PPM1L	4.55683	20.6898	2.18282	0.00204108
AMISG024653	MEGF6	3.41817	10.2954	1.5907	0.0271527

## Sheet: Gonad 3d Male-biased
Gene ID	Gene symbol	Mean male expression (FPKM)	Mean female expression (FPKM)	Log2 fold change	FDR-adjusted p-value
AMISG000758	TNNI2	15.2387	3.85504	-1.98293	0.0186027
AMISG000877	-	12.2212	2.16815	-2.49484	0.0282469
AMISG001149	-	22.3415	0	0	0.0100622
AMISG002445	-	3.65692	0	0	0.0149937
AMISG003403	-	10.5437	1.98028	-2.41261	0.00356734
AMISG004981	-	13.312	0	0	0.0157388
AMISG005032	-	1366	379.732	-1.84691	0.0293426
AMISG010283	CATH2	188.528	29.4252	-2.67965	0.00204108
AMISG010284	-	161.423	29.0887	-2.47232	0.0142304
AMISG011231	-	2.97679	0	0	0.0192798
AMISG012984	-	76.3951	22.4579	-1.76626	0.0391997
AMISG013685	-	7.64181	0	0	0.0237082
AMISG017088	-	36.935	2.85771	-3.69206	0.0298902
AMISG017669	-	8.91273	0	0	0.0248932
AMISG018248	-	292.098	104.273	-1.48608	0.0458427
AMISG019030	-	5.12194	0	0	0.0149937
AMISG019485	-	12.6617	0	0	0.00204108
AMISG020984	-	1.96194	0	0	0.0149937
AMISG022217	-	61.8236	14.0725	-2.13528	0.0142304
AMISG022299	SRGN	124.389	39.6513	-1.64941	0.0254788

## Sheet: Adrenal 30d Female-biased
Gene ID	Gene symbol	Mean male expression (FPKM)	Mean female expression (FPKM)	Log2 fold change	FDR-adjusted p-value
AMISG000151	-	14.7235	68.0613	2.20871	0.0324731
AMISG000167	GUCA2B	4.87105	111.471	4.51629	0.00816017
AMISG000202	ATP6V1B2	15.9748	153.753	3.26674	0.00204108
AMISG000364	STAP2	3.87641	25.688	2.7283	0.0192798
AMISG000424	ARG2	43.4922	171.478	1.9792	0.0186027
AMISG000585	-	17.538	91.3119	2.38032	0.00604775
AMISG000718	HPS5L	0	1.98938	0	0.0466855
AMISG000773	-	0.285441	8.86496	4.95685	0.00204108
AMISG000774	-	0	3.91897	0	0.0479451
AMISG001268	CALML4	75.5248	631.263	3.06322	0.0126421
AMISG001387	RHCG	13.405	118.317	3.14182	0.00204108
AMISG001785	ANXA8L1	20.0156	116.143	2.53671	0.00204108
AMISG002167	CXCL13	0	2.54338	0	0.0479451
AMISG002678	CTSZ	48.3283	237.81	2.29887	0.00356734
AMISG002696	-	6.09098	32.0362	2.39495	0.00356734
AMISG002971	APOV1	17.3525	241.549	3.7991	0.0324731
AMISG003057	-	90.9547	442.847	2.28359	0.0298902
AMISG003113	MPC2	382.267	1637.66	2.09899	0.0205944
AMISG003119	GPA33-1	5.07107	42.9642	3.08277	0.00204108
AMISG003377	MFSD4	5.87423	37.8342	2.68722	0.00204108
AMISG003427	-	0	2.50729	0	0.0349672
AMISG003478	-	1.82096	13.1299	2.85009	0.0192798
AMISG003551	PCSK9	3.35272	17.7748	2.40643	0.00204108
AMISG003574	TSPAN1	12.3543	92.675	2.90717	0.00204108
AMISG003583	FAAH-2	31.2774	135.086	2.11069	0.0410227
AMISG003708	FABP4	33.1725	182.304	2.45829	0.0218769
AMISG004300	-	0	2.01834	0	0.0118067
AMISG004892	-	0	1.35244	0	0.00204108
AMISG004956	EMX1	52.8653	245.837	2.21731	0.0414854
AMISG005000	-	0	8.82192	0	0.0349672
AMISG005086	-	0	27.8292	0	0.00204108
AMISG005087	-	13.5352	105.152	2.95769	0.00816017
AMISG005088	GLYATL3	8.94807	78.5471	3.13391	0.00204108
AMISG005392	CLDN6	2.90568	15.3381	2.40017	0.0260507
AMISG005474	-	5.19025	17.1509	1.72441	0.0414854
AMISG005531	-	13.5898	82.9343	2.60944	0.0172186
AMISG005548	AMBP	46.4459	222.445	2.25983	0.0410227
AMISG005847	GAMT	215.196	1048.14	2.28411	0.0126421
AMISG005871	EPHX2	24.9253	159.423	2.67718	0.00487238
AMISG005913	-	0	24.8525	0	0.00204108
AMISG006050	AGTRAP	37.1899	122.505	1.71986	0.0334893
AMISG006712	HMGCS2	10.8975	47.5627	2.12583	0.0410227
AMISG006815	-	21.6911	145.579	2.74663	0.00604775
AMISG006885	LGALS12	0	2.17937	0	0.00204108
AMISG006886	SLC22A6	11.9065	171.003	3.8442	0.00204108
AMISG006887	-	17.5281	135.503	2.95058	0.00204108
AMISG006888	-	8.89944	133.765	3.90984	0.00204108
AMISG006892	CHRM1	3.0288	13.6775	2.17499	0.0277031
AMISG007112	-	1.05427	13.6239	3.69182	0.00487238
AMISG007150	-	0	16.9137	0	0.00204108
AMISG008054	BPHL	19.8647	76.7732	1.9504	0.0349672
AMISG008120	UPK2	2.60907	31.3573	3.58719	0.0483608
AMISG008240	PDILT	8.19297	83.757	3.35375	0.00204108
AMISG008306	ZFAND2A	17.201	62.6915	1.86577	0.0471124
AMISG008443	TMEM86B	0	2.85867	0	0.00204108
AMISG009008	-	5.21675	27.8219	2.415	0.0432549
AMISG009063	NNMT	89.0184	289.899	1.70337	0.0445481
AMISG009125	-	9.25859	41.4493	2.16248	0.0428157
AMISG009128	PLG	3.44055	14.9582	2.12023	0.0339876
AMISG010170	PDZD3	4.86217	46.7804	3.26623	0.00204108
AMISG010190	KCNJ1	6.29202	35.7195	2.50512	0.0266267
AMISG010413	SLC5A2	3.94287	32.658	3.05012	0.0179141
AMISG010417	-	5.9688	50.6505	3.08506	0.0126421
AMISG011311	ATP6V1C2	10.5853	64.7839	2.61357	0.00487238
AMISG011687	ACMSD	1.06955	15.8128	3.88602	0.0293426
AMISG011730	SLC12A8	1.62343	14.0957	3.11813	0.00604775
AMISG011899	CREB3L3-1	1.29046	9.005	2.80285	0.0248932
AMISG012404	-	0.797168	8.37447	3.39304	0.0142304
AMISG012566	CFC1B	0	1.6108	0	0.00604775
AMISG012719	SLC44A2	3.51581	20.1409	2.5182	0.0414854
AMISG012873	FOXI2	0	4.09513	0	0.00204108
AMISG012986	CRISP2	91.1394	692.364	2.92538	0.00204108
AMISG013080	HPN	0.752364	29.7168	5.30371	0.00487238
AMISG013323	LPO	11.9094	72.7224	2.6103	0.00816017
AMISG013591	MARC2-1	65.6063	366.465	2.48177	0.00604775
AMISG013741	-	7.63498	45.3025	2.56889	0.0363893
AMISG013802	MUC4	41.4424	148.127	1.83765	0.0354479
AMISG014054	-	0	1.44408	0	0.00204108
AMISG014065	SLC13A5	3.73493	17.7358	2.24751	0.0224934
AMISG014187	ME1	96.1101	410.304	2.09393	0.0266267
AMISG014315	SHMT1	13.191	57.4255	2.12214	0.0118067
AMISG014401	MSRB2	19.5093	85.0796	2.12465	0.0363893
AMISG014718	LYPD2	0	13.3196	0	0.00204108
AMISG014745	DHRS7	256.738	982.226	1.93576	0.0243004
AMISG014855	APOA2	454.097	4002.12	3.13969	0.00204108
AMISG014961	-	1.51177	6.80293	2.16992	0.0243004
AMISG015092	SLC25A47	50.5843	256.437	2.34184	0.0271527
AMISG015098	CYP46A1	5.68041	24.0354	2.0811	0.0205944
AMISG015130	SERPINA4	1.60033	13.6149	3.08875	0.0186027
AMISG015166	-	3.45079	14.3118	2.0522	0.0192798
AMISG015308	-	8.00029	79.6955	3.31637	0.00204108
AMISG015725	-	1.47813	8.88058	2.58688	0.0248932
AMISG015728	-	6.71789	58.891	3.13197	0.0109457
AMISG016039	-	0	5.00755	0	0.00204108
AMISG016464	SLC9A3R1	43.3256	237.986	2.45759	0.00204108
AMISG016496	-	9.52166	28.3385	1.57348	0.0458427
AMISG016603	-	5.32987	24.1564	2.18023	0.0373357
AMISG016696	OR52B2	1.32553	20.2929	3.93633	0.00713776
AMISG016766	STC1	3.05449	16.6326	2.44501	0.0368661
AMISG016795	-	1.87363	12.9067	2.78422	0.0329831
AMISG016886	RIBC2	2.5589	14.792	2.53122	0.00713776
AMISG016943	-	0	2.89345	0	0.00816017
AMISG017043	OCLNL	4.04258	21.2636	2.39503	0.0109457
AMISG017117	DCAF11	29.4804	87.9264	1.57654	0.037803
AMISG017475	IGFBP1	24.7685	129.847	2.39023	0.0100622
AMISG017690	ALOX5	3.15705	16.938	2.42361	0.034486
AMISG017728	KRT8	42.4805	193.333	2.18622	0.00604775
AMISG018116	AOC3	3.02343	21.2106	2.81053	0.00356734
AMISG018533	-	0	1.80759	0	0.00204108
AMISG018589	-	0	6.30976	0	0.00204108
AMISG018715	DAO	41.6227	341.045	3.03452	0.00204108
AMISG018720	ISCU	75.5041	250.594	1.73072	0.034486
AMISG018872	DHRS1	7.11078	29.931	2.07356	0.0212344
AMISG018986	ALDH8A1	5.66085	28.7258	2.34326	0.0118067
AMISG019011	PERP2	5.51262	25.9953	2.23744	0.0248932
AMISG019241	-	6.76568	39.4674	2.54436	0.00604775
AMISG019309	-	0	17.2643	0	0.00204108
AMISG019420	MIOX	134.865	1047.22	2.95698	0.00487238
AMISG019470	-	2.20995	23.2636	3.39599	0.00816017
AMISG019580	-	28.3409	96.0554	1.76098	0.0354479
AMISG019660	-	1.81707	13.056	2.84503	0.00204108
AMISG020091	-	0	4.49686	0	0.0419301
AMISG020100	-	0	4.09019	0	0.00604775
AMISG020248	SDC1	17.5389	56.4199	1.68565	0.034486
AMISG020431	-	14.6254	105.819	2.85506	0.0387373
AMISG020544	SLC39A2L	0	6.91473	0	0.0100622
AMISG020690	DBNDD1	0	2.04183	0	0.037803
AMISG021289	FABP1	8.49982	186.595	4.45634	0.00356734
AMISG021637	-	0.782949	7.3748	3.23561	0.00204108
AMISG021918	CTSH	23.3041	100.03	2.10178	0.00713776
AMISG022081	-	0	2.51898	0	0.0218769
AMISG022375	-	23.3711	122.032	2.38446	0.037803
AMISG022457	ACE2	1.64146	12.18	2.89146	0.0164845
AMISG022587	-	9.38666	59.1501	2.6557	0.0277031
AMISG022658	CMBL	200.519	840.476	2.06747	0.0218769
AMISG022737	-	5.60461	30.8271	2.45951	0.0401211
AMISG022741	GSTT1L	133.544	500.997	1.90749	0.00913986
AMISG022763	-	1.90014	11.0548	2.5405	0.00604775
AMISG022945	-	6.59154	28.1707	2.09551	0.00713776
AMISG023078	SFN	1.94085	25.7646	3.73063	0.0186027
AMISG023393	-	0	5.91848	0	0.00204108
AMISG023492	-	29.3562	92.7349	1.65945	0.0401211
AMISG023861	SNTN	0	1.49001	0	0.0298902
AMISG023875	FAM3D	5.42601	35.9896	2.72961	0.0282469
AMISG023893	RNF212B	0	1.38911	0	0.00204108
AMISG024220	-	2.63167	12.6577	2.26597	0.0192798
AMISG024342	MGST1	150.023	600.547	2.00109	0.0304148
AMISG024451	-	0	2.17183	0	0.0218769
AMISG024606	VEPH1	4.10877	21.306	2.37448	0.00713776
AMISG024649	SERPINI1	78.9747	316.291	2.00179	0.00816017
AMISG024680	CALB1	143.967	538.273	1.9026	0.0387373
AMISG024694	ATP6V0D2	26.2902	157.547	2.58319	0.00356734

## Sheet: Adrenal 30d Male-biased
Gene ID	Gene symbol	Mean male expression (FPKM)	Mean female expression (FPKM)	Log2 fold change	FDR-adjusted p-value
AMISG000011	-	467.493	62.1877	-2.91024	0.00604775
AMISG000037	TMEM47	149.257	10.8107	-3.78726	0.00204108
AMISG000045	-	24.9105	5.12222	-2.28191	0.0212344
AMISG000059	-	6.546	0	0	0.00604775
AMISG000062	VPS28	2945.8	292.138	-3.33394	0.00816017
AMISG000068	-	70.8836	16.4348	-2.1087	0.0458427
AMISG000258	CTSG	41.7233	2.04613	-4.34988	0.0410227
AMISG000265	-	46.6398	7.43413	-2.64933	0.00487238
AMISG000287	PALM-1	159.29	23.6035	-2.75459	0.0192798
AMISG000293	CFD	936.409	115.715	-3.01656	0.0432549
AMISG000376	RUSC1	15.1373	3.20462	-2.23989	0.0100622
AMISG000383	-	8.05985	1.72749	-2.22208	0.0471124
AMISG000404	-	2.275	0.389509	-2.54614	0.0423695
AMISG000492	TSPAN18	99.9754	6.38912	-3.96788	0.00204108
AMISG000556	-	7.17296	0	0	0.0282469
AMISG000725	SPTY2D1	302.346	22.1768	-3.76908	0.0231024
AMISG000750	-	190.373	38.3624	-2.31106	0.00604775
AMISG000790	SMAD4	45.206	7.70075	-2.55344	0.0157388
AMISG000792	S100A1	2395.25	148.666	-4.01003	0.00816017
AMISG000793	S100A13	1240.14	64.1035	-4.27396	0.00356734
AMISG000920	CPLX1	123.382	18.575	-2.73169	0.00204108
AMISG001093	-	180.573	27.8428	-2.69721	0.00713776
AMISG001100	-	118.973	24.3308	-2.28978	0.0271527
AMISG001111	MAP6	137.936	37.0064	-1.89815	0.0309463
AMISG001135	-	4.55405	0	0	0.00604775
AMISG001155	TTC39A	45.1296	5.97556	-2.91693	0.00356734
AMISG001342	-	4.70137	0	0	0.0282469
AMISG001364	AKAP13-1	17.2928	2.2011	-2.97388	0.0149937
AMISG001433	HDC	14.4292	2.40028	-2.58772	0.00604775
AMISG001504	DYX1C1	39.9323	6.65012	-2.5861	0.0243004
AMISG001590	-	13.109	3.08674	-2.0864	0.00713776
AMISG001600	RORA	18.3671	1.67997	-3.45062	0.00713776
AMISG001609	KLF13-1	104.723	2.36661	-5.46762	0.00204108
AMISG001642	FAM63B	14.4802	1.77945	-3.02458	0.0212344
AMISG001683	-	9.40029	0	0	0.0282469
AMISG001715	SEMA7A	26.7219	5.96546	-2.16332	0.0237082
AMISG001727	CEP131	47.4205	10.2211	-2.21396	0.0212344
AMISG001793	-	9.92218	0	0	0.00204108
AMISG001851	-	309.206	25.9208	-3.57639	0.00204108
AMISG001930	ZCCHC17	1596.1	71.1659	-4.48723	0.00204108
AMISG001937	-	25.6362	0	0	0.00204108
AMISG002047	ELOVL6	64.3109	12.8661	-2.32149	0.0324731
AMISG002059	COL25A1-1	5.46979	0.619461	-3.1424	0.00356734
AMISG002141	REST	38.5692	3.72553	-3.37193	0.00356734
AMISG002145	ARL9	813.151	94.4934	-3.10524	0.0359217
AMISG002191	CHRNG	2.04125	0	0	0.00204108
AMISG002212	VWA5B1L	17.1751	1.69038	-3.3449	0.00204108
AMISG002375	-	31.715	3.04142	-3.38234	0.00204108
AMISG002399	CDCA5	204.201	30.7834	-2.72976	0.00204108
AMISG002553	-	20.8753	6.25033	-1.7398	0.0462558
AMISG002564	TRIM67	5.73448	1.12204	-2.35355	0.0339876
AMISG002605	-	18.2428	2.58135	-2.82113	0.0126421
AMISG002617	CHRNA2	30.8999	3.91832	-2.9793	0.00204108
AMISG002658	-	34.1332	4.8903	-2.80318	0.00816017
AMISG002774	-	10.5782	3.18121	-1.73345	0.0495673
AMISG002796	MATN4	36.3394	1.54127	-4.55934	0.00204108
AMISG002824	ADIG	28.7468	4.22435	-2.7666	0.0324731
AMISG002835	-	7.76134	1.81806	-2.09391	0.0314575
AMISG002837	-	25.7605	4.42747	-2.54061	0.00487238
AMISG002879	PEX6	118.415	29.6608	-1.99722	0.0179141
AMISG002881	CNPY3	117.798	35.8017	-1.71821	0.0218769
AMISG002882	PTCRA	202.741	40.6727	-2.3175	0.0172186
AMISG002988	LSAMP	18.1921	2.89305	-2.65265	0.0277031
AMISG003097	ABI3BP	23.9072	3.92842	-2.60543	0.00913986
AMISG003128	PTGFRN	38.9013	11.4553	-1.7638	0.0436786
AMISG003226	JAM2	227.088	47.9455	-2.24378	0.0237082
AMISG003315	-	7.09395	2.05068	-1.79049	0.0466855
AMISG003339	-	346.012	45.8756	-2.91502	0.00204108
AMISG003435	-	55.6493	0	0	0.00204108
AMISG003474	-	8.61873	0	0	0.00604775
AMISG003577	-	71.9009	7.73089	-3.2173	0.00356734
AMISG003628	RHEBL1	23.5965	2.00086	-3.55988	0.0329831
AMISG003635	-	3.68077	0	0	0.0282469
AMISG003778	MCMDC2	9.26955	0.411071	-4.49504	0.00204108
AMISG003810	-	72.5594	4.4414	-4.03007	0.0339876
AMISG003812	CA8	121.917	40.7761	-1.58011	0.0354479
AMISG003925	FDX1L	201.979	31.964	-2.65968	0.0100622
AMISG003936	NABP2	218.475	37.7367	-2.53343	0.0142304
AMISG003937	-	2.2668	0	0	0.00204108
AMISG004027	BDP1-1	82.9391	4.66621	-4.15173	0.0243004
AMISG004212	TMEM145	94.2175	14.6066	-2.68938	0.00487238
AMISG004237	NUDT22	210.348	34.0061	-2.62891	0.00713776
AMISG004238	-	109.176	22.0622	-2.307	0.0349672
AMISG004297	-	1.84843	0.382884	-2.27132	0.0271527
AMISG004432	-	2.96257	0	0	0.00204108
AMISG004457	GNRHRL	22.7893	5.5795	-2.03015	0.0423695
AMISG004469	NUDT17	54.1912	7.04087	-2.94423	0.00487238
AMISG004500	GPATCH4	208.744	47.1458	-2.14653	0.0423695
AMISG004506	HAPLN2	20.8239	4.91621	-2.08262	0.0396667
AMISG004516	ECM1	359.984	29.4467	-3.61176	0.0309463
AMISG004536	-	23.5561	1.5186	-3.95528	0.0157388
AMISG004625	WBP4	89.8052	21.9146	-2.0349	0.0419301
AMISG004644	-	59.1661	0	0	0.00204108
AMISG004710	BHMG1	13.2855	2.68949	-2.30444	0.037803
AMISG004713	-	9.9506	0	0	0.0293426
AMISG004718	SIMC1-1	11.1326	2.1912	-2.34501	0.0401211
AMISG004739	NAA38	367.074	58.7276	-2.64396	0.00487238
AMISG004757	-	7.18403	0	0	0.00604775
AMISG004814	-	3.25541	0.268556	-3.59954	0.0172186
AMISG004827	PURA	36.9823	5.80897	-2.67048	0.0126421
AMISG004893	HRC	8.20843	0	0	0.00204108
AMISG004900	-	127.543	15.6849	-3.02353	0.00356734
AMISG004901	LGALS7B	483.098	5.59969	-6.43083	0.00204108
AMISG004902	-	483.963	26.8577	-4.17149	0.0212344
AMISG005045	-	5.10747	0.643185	-2.9893	0.0354479
AMISG005219	-	2080.26	86.7724	-4.58338	0.0149937
AMISG005350	-	1128.1	71.9332	-3.97109	0.00204108
AMISG005353	FAM167A	14.3011	2.4522	-2.54397	0.045404
AMISG005360	CCDC159	33.1937	2.22094	-3.90167	0.00204108
AMISG005366	CCDC151	64.3319	4.85487	-3.72803	0.00204108
AMISG005370	-	23.6605	2.88605	-3.03532	0.0237082
AMISG005374	-	17.8853	3.15821	-2.5016	0.0199504
AMISG005383	MFAP4	333.765	27.2794	-3.61295	0.00204108
AMISG005393	-	65.0371	6.72979	-3.27263	0.0142304
AMISG005450	CYB561D2	19.4957	3.65459	-2.41537	0.0449682
AMISG005452	-	6.66214	1.78264	-1.90197	0.0432549
AMISG005478	RRP9	464.89	68.503	-2.76265	0.0243004
AMISG005481	PCBP4	40.8617	10.547	-1.95392	0.0309463
AMISG005500	SSNA1	453.31	81.8238	-2.46991	0.00913986
AMISG005502	TMEM203	61.0035	11.9437	-2.35264	0.0298902
AMISG005596	-	3.8423	1.08656	-1.82221	0.0282469
AMISG005623	-	676.455	51.2703	-3.7218	0.00487238
AMISG005634	PIP5KL1	41.4247	6.56077	-2.65856	0.0164845
AMISG005675	FAM73B	39.19	12.822	-1.61187	0.0319616
AMISG005695	NCS1	739.745	65.1889	-3.50433	0.0354479
AMISG005733	CEL	20.3978	2.57599	-2.98521	0.00816017
AMISG005738	RPL7A	32059.4	7731.6	-2.05191	0.0495673
AMISG005754	BRD3A	120.556	3.6815	-5.03326	0.00204108
AMISG005765	-	197.092	22.0372	-3.16085	0.0271527
AMISG005784	CARD9	54.0808	7.01421	-2.94676	0.00356734
AMISG005853	DPCD	1499.86	122.106	-3.61862	0.0186027
AMISG005862	CIB4	577.888	25.7047	-4.49069	0.0126421
AMISG005925	HBAA	367903	53968.1	-2.76915	0.0449682
AMISG005966	ESPN	21.6968	5.3718	-2.014	0.00913986
AMISG005969	RNASEH2A	1042.86	130.336	-3.00024	0.034486
AMISG005974	NEURL2	480.505	104.111	-2.20643	0.0382801
AMISG005976	PLTP	126.894	19.8776	-2.67441	0.0186027
AMISG005979	GPR153	6.06124	0.80534	-2.91194	0.0401211
AMISG005984	-	22.2809	5.47023	-2.02613	0.0334893
AMISG005988	-	3.25739	0	0	0.0298902
AMISG006001	-	12.5208	1.65844	-2.91643	0.0218769
AMISG006048	MTHFR	139.67	34.1762	-2.03096	0.0445481
AMISG006060	SS2	8669.83	1376.29	-2.65522	0.0401211
AMISG006128	MXRA8	179.286	30.9297	-2.5352	0.00604775
AMISG006188	UPF3A-1	34.3835	5.66362	-2.60192	0.0164845
AMISG006376	-	14.9598	0	0	0.00604775
AMISG006462	GNG3	490.062	38.9402	-3.65363	0.00204108
AMISG006507	PPP1R35	154.378	40.4314	-1.93291	0.0428157
AMISG006550	-	22.6198	3.73443	-2.59863	0.0109457
AMISG006551	-	352.914	56.6228	-2.63986	0.0109457
AMISG006659	METTL3	129.718	16.0808	-3.01197	0.00204108
AMISG006662	-	365.109	48.2652	-2.91927	0.0100622
AMISG006673	ITGB1BP2	153.418	16.9496	-3.17815	0.0100622
AMISG006734	RGS5	483.838	155.708	-1.63568	0.0414854
AMISG006786	-	50.0835	3.49812	-3.83968	0.00204108
AMISG006819	-	386.491	61.6801	-2.64756	0.0164845
AMISG006826	-	26.1154	2.85802	-3.19181	0.0396667
AMISG006838	-	25.4791	0	0	0.00356734
AMISG006846	-	5.48391	0	0	0.00204108
AMISG006900	MRPL49	3448.44	380.355	-3.18053	0.0205944
AMISG006902	ZNHIT2	152.777	15.0927	-3.3395	0.0499536
AMISG006975	CCS	62.2814	10.6905	-2.54247	0.0118067
AMISG006979	-	15.7494	1.32421	-3.57209	0.00204108
AMISG006980	MAP4K1	8.79724	0.919695	-3.25782	0.00356734
AMISG006996	-	193.906	52.3179	-1.88998	0.0466855
AMISG006997	ZNHIT1	308.369	50.5439	-2.60905	0.00713776
AMISG007001	ADAT3	21.6137	1.47302	-3.8751	0.0126421
AMISG007013	-	361.466	56.4399	-2.67907	0.00487238
AMISG007026	SRRM3-1	50.4789	1.11717	-5.49776	0.00204108
AMISG007123	-	289.24	18.1896	-3.99108	0.0266267
AMISG007155	MSI2	389.738	46.6975	-3.06109	0.0199504
AMISG007260	PLP1-1	123.524	27.6204	-2.16098	0.0142304
AMISG007306	-	341.096	62.4486	-2.44944	0.0293426
AMISG007309	GPS2	140.357	21.3228	-2.71863	0.0419301
AMISG007384	DKC1	685.441	90.0894	-2.9276	0.045404
AMISG007408	-	19.1636	4.94031	-1.95569	0.00816017
AMISG007445	COX5B	4679.59	629.346	-2.89446	0.0248932
AMISG007448	POLM	216.684	8.71447	-4.63603	0.00487238
AMISG007509	-	1.58416	0.383289	-2.04721	0.045404
AMISG007599	-	42.2029	11.2481	-1.90766	0.0243004
AMISG007651	RAB24	228.546	49.6957	-2.20129	0.0277031
AMISG007673	FAHD2A	1655.69	104.525	-3.98551	0.00356734
AMISG007694	-	691.306	50.2477	-3.78219	0.0118067
AMISG007842	-	79.0233	11.2625	-2.81075	0.0172186
AMISG007968	-	21.0154	1.51853	-3.7907	0.00204108
AMISG008207	-	54.8854	12.3535	-2.1515	0.0499536
AMISG008270	USP42	9.63956	1.16285	-3.0513	0.0205944
AMISG008312	MAFK	274.395	14.1435	-4.27804	0.0199504
AMISG008332	AMZ1	32.4209	8.90508	-1.86422	0.0462558
AMISG008346	RADIL	16.5272	2.90599	-2.50774	0.0298902
AMISG008348	SLC29A4	17.7152	3.67833	-2.26786	0.0149937
AMISG008400	FXYD6	1685.71	148.735	-3.50254	0.0368661
AMISG008402	TRMT112	95.0171	17.4001	-2.44909	0.0205944
AMISG008411	-	138.228	29.7997	-2.21368	0.0432549
AMISG008421	PTH2	6.22091	0	0	0.00204108
AMISG008561	LY6G6C	426.246	53.8683	-2.98418	0.00204108
AMISG008619	NOP58	827.287	101.943	-3.02063	0.0293426
AMISG008636	PARD3B	72.549	16.3588	-2.14889	0.0224934
AMISG008637	-	118.145	19.3879	-2.60733	0.0314575
AMISG008728	PRLHL	1323.99	369.873	-1.83979	0.0172186
AMISG008843	ASNSD1	1155.3	145.862	-2.9856	0.0479451
AMISG008882	IL2RG-1	150.14	24.459	-2.61787	0.0254788
AMISG008891	-	2.13735	0	0	0.0282469
AMISG008898	-	26.8354	2.87545	-3.22228	0.00204108
AMISG008983	-	36.5996	4.12183	-3.15047	0.00204108
AMISG008994	TMED1	246.651	33.3026	-2.88877	0.00204108
AMISG009020	CLU	1545.07	167.556	-3.20496	0.0149937
AMISG009021	SCARA3	12.9308	2.30044	-2.49083	0.0436786
AMISG009032	AAAS	162.302	41.0564	-1.98301	0.0309463
AMISG009059	TIMP1	2868.48	208.426	-3.78268	0.00204108
AMISG009162	MLLT4	23.3654	4.44233	-2.39498	0.0205944
AMISG009184	-	2.17068	0	0	0.0282469
AMISG009309	-	10.331	0.563232	-4.1971	0.0288014
AMISG009424	-	21.1715	1.71882	-3.62264	0.00204108
AMISG009618	-	19.2872	3.55908	-2.43807	0.00204108
AMISG009640	CYP17A1	11602.8	501.767	-4.53131	0.00713776
AMISG009734	DYM	38.6311	13.1627	-1.55331	0.0479451
AMISG009735	-	1056.86	29.3509	-5.17023	0.00713776
AMISG009753	DCC	3.56129	0.345098	-3.36732	0.0134561
AMISG009865	NIM1K	12.7735	1.9048	-2.74544	0.0134561
AMISG010015	CPEB1	16.5489	3.82299	-2.11397	0.0243004
AMISG010016	AP3B2	172.912	14.4904	-3.57687	0.0224934
AMISG010024	PRKACA	11.4413	2.06247	-2.47181	0.0134561
AMISG010032	-	3.75414	0	0	0.00816017
AMISG010124	ZNF347	6.6719	1.57813	-2.07988	0.0329831
AMISG010147	-	62.7125	9.10742	-2.78364	0.0134561
AMISG010168	ABCG1	3.08059	0.491616	-2.6476	0.034486
AMISG010236	PPP1R1A	85.0765	8.24568	-3.36705	0.00487238
AMISG010238	NCKAP1L	55.8544	7.58833	-2.87982	0.00356734
AMISG010254	-	30.9445	5.70609	-2.43911	0.0271527
AMISG010256	RETN	128.432	13.3879	-3.26201	0.00204108
AMISG010268	ZNF526	62.6357	4.2649	-3.8764	0.0334893
AMISG010301	MAF	1274.13	78.3506	-4.02342	0.00356734
AMISG010327	CDH13	36.4829	6.43906	-2.5023	0.00204108
AMISG010414	-	101.159	23.4153	-2.1111	0.0396667
AMISG010623	-	100.794	18.8051	-2.42222	0.0179141
AMISG010628	EIF4A3	340.141	107.078	-1.66747	0.0414854
AMISG010872	COL23A1	11.5038	0.804994	-3.83699	0.0118067
AMISG010910	-	26321	3115.25	-3.07879	0.0205944
AMISG010919	GNB2L1	23317.3	4447.41	-2.39036	0.0224934
AMISG010952	-	5.00008	0	0	0.0282469
AMISG010957	SPINK5-1	5.11008	0.416382	-3.61737	0.0391997
AMISG010961	SPINK1	7411.17	275.88	-4.74759	0.00356734
AMISG010970	CCDC69-1	28.933	2.47154	-3.54923	0.00604775
AMISG010986	-	7.89226	0	0	0.00204108
AMISG010997	-	7.87079	0	0	0.0288014
AMISG011066	GCH1-2	100.291	24.9535	-2.00688	0.0483608
AMISG011094	UBN1	24.379	0.790301	-4.94709	0.00204108
AMISG011124	PDE2A	40.7637	14.453	-1.49592	0.0458427
AMISG011189	NAALADL1	5.03333	0.583262	-3.1093	0.0329831
AMISG011203	-	68.1072	10.2155	-2.73705	0.0419301
AMISG011204	MAN2A1	80.664	14.0813	-2.51814	0.0100622
AMISG011272	-	38.2803	0	0	0.00204108
AMISG011332	-	4.07942	0	0	0.0282469
AMISG011357	-	150.88	7.093	-4.41086	0.00204108
AMISG011362	CDC25C	985.418	165.58	-2.57321	0.0441196
AMISG011366	REEP2	11.5197	1.22835	-3.22931	0.0487658
AMISG011482	HOXD12	5.16249	0	0	0.0282469
AMISG011533	PPIG	542.433	69.2976	-2.96857	0.0487658
AMISG011777	-	22.2917	0	0	0.00204108
AMISG011800	RPL37A	206263	16214.3	-3.66915	0.0314575
AMISG011814	UBXN1	54.0193	7.31982	-2.88359	0.00356734
AMISG011818	GOLGA7B	117.125	6.72138	-4.12314	0.00204108
AMISG011832	-	3.25451	0	0	0.00204108
AMISG011853	SLC26A11	83.6539	9.02123	-3.21304	0.0142304
AMISG011862	C5AR1	21.0929	1.53411	-3.78128	0.0212344
AMISG011973	NFIB	17.9984	4.53463	-1.98881	0.037803
AMISG011984	REXO1-1	16.3578	4.18712	-1.96595	0.0293426
AMISG011997	AP3D1	421.122	34.2122	-3.62165	0.00604775
AMISG012001	AMH	946.128	10.8872	-6.44133	0.00204108
AMISG012018	-	180.088	23.6039	-2.9316	0.0218769
AMISG012019	-	89.2272	17.1594	-2.37849	0.0293426
AMISG012038	PNMT	3035.08	429.327	-2.82159	0.00604775
AMISG012071	MLLT10-1	470.105	13.6444	-5.10661	0.0449682
AMISG012074	SRCIN1	3.20269	0.382891	-3.06428	0.0231024
AMISG012136	SAMD14-1	95.2353	9.94828	-3.25898	0.00204108
AMISG012176	ANKHD1	55.4431	4.50561	-3.62121	0.0248932
AMISG012291	-	4.14986	0	0	0.00204108
AMISG012327	GABPB2	83.7106	3.20178	-4.70847	0.0100622
AMISG012334	TMOD4	93.2934	19.0856	-2.28929	0.034486
AMISG012351	RIIAD1	1478.91	134.731	-3.45638	0.0432549
AMISG012354	TDRKH	23.1257	6.30724	-1.87442	0.0449682
AMISG012358	THEM4	215.102	47.0936	-2.19142	0.0314575
AMISG012359	S100A10	1534.45	129.708	-3.56438	0.00816017
AMISG012369	LIM2	98.7085	11.8793	-3.05473	0.0109457
AMISG012377	-	3.1214	0	0	0.00604775
AMISG012393	CD164L2	166.86	9.03293	-4.2073	0.0205944
AMISG012399	FAM183A	91.4115	20.4327	-2.1615	0.0423695
AMISG012426	-	285.951	31.1788	-3.19713	0.0142304
AMISG012437	LRRC71	26.6448	5.0462	-2.40058	0.0186027
AMISG012439	SYMPK	320.255	42.0862	-2.9278	0.0471124
AMISG012449	-	192.697	32.1872	-2.58178	0.0142304
AMISG012621	PSAT1	26.6391	5.42791	-2.29508	0.0436786
AMISG012655	KLF9	271.652	2.43996	-6.79876	0.00204108
AMISG012726	-	7822.53	353.06	-4.46965	0.00204108
AMISG012741	PARP10	8.09775	1.48992	-2.44229	0.0260507
AMISG012742	RGS14	55.1776	6.244	-3.14354	0.00204108
AMISG012745	EHBP1L1	42.0826	8.55669	-2.2981	0.00356734
AMISG012755	-	65.0029	0	0	0.00204108
AMISG012783	-	25.2418	1.52091	-4.05281	0.00204108
AMISG012817	-	39.4246	2.9998	-3.71616	0.0391997
AMISG012899	WDR74	70.6155	7.60181	-3.21557	0.00204108
AMISG012900	-	1421.79	291.5	-2.28614	0.0319616
AMISG012916	GPR83	7.06487	0.358768	-4.29954	0.0462558
AMISG012925	ENDOD1	23.4274	7.42027	-1.65865	0.045404
AMISG013016	FAM212A	141.46	31.1518	-2.183	0.0324731
AMISG013024	BSN	11.0962	0.732544	-3.921	0.0199504
AMISG013066	-	7.87266	0	0	0.00204108
AMISG013069	ZWINT	110.28	29.1111	-1.92154	0.0499536
AMISG013073	-	2.35373	0	0	0.0282469
AMISG013078	-	111.942	14.6208	-2.93666	0.00204108
AMISG013108	CRYGS	45.8482	1.20526	-5.24945	0.0373357
AMISG013116	-	5.95435	0	0	0.00204108
AMISG013170	-	3355.61	261.941	-3.67926	0.0179141
AMISG013195	ESPNL-1	19.1471	6.44049	-1.57189	0.0495673
AMISG013271	PLXND1	16.9354	5.92157	-1.51599	0.0466855
AMISG013325	EIF4E1B	34.9139	1.64205	-4.41023	0.00604775
AMISG013326	SNCB	283.591	30.2759	-3.22757	0.00204108
AMISG013332	-	35.372	6.05197	-2.54713	0.0359217
AMISG013333	RASGRP2-1	12.0895	2.27422	-2.41031	0.0192798
AMISG013348	PHF23-2	587.151	95.3261	-2.62279	0.00913986
AMISG013350	-	24.2816	2.93416	-3.04884	0.00487238
AMISG013409	-	29.871	4.13954	-2.8512	0.00913986
AMISG013410	LAMTOR4	477.72	75.1128	-2.66903	0.00487238
AMISG013412	MBLAC1	53	4.45544	-3.57235	0.00713776
AMISG013413	CNPY4	43.9625	5.463	-3.00851	0.0288014
AMISG013614	GPATCH2	18.4596	3.83272	-2.26793	0.0491647
AMISG013651	-	337.606	59.0458	-2.51543	0.0100622
AMISG013663	-	8.95344	0	0	0.00204108
AMISG013783	CYP21A2	578.821	89.6832	-2.69021	0.00204108
AMISG013791	-	3.00192	0	0	0.0298902
AMISG013868	SMIM7	471.744	76.3269	-2.62774	0.00816017
AMISG013903	-	169.06	6.5608	-4.68752	0.00204108
AMISG013909	-	1.839	0	0	0.00604775
AMISG013955	ANTXRL	8.38722	2.30601	-1.8628	0.0432549
AMISG013991	COL9A1	10.7675	0.702333	-3.93839	0.00356734
AMISG014173	NT5E	15.4481	2.43126	-2.66765	0.00713776
AMISG014207	PHIP	41.8083	3.03991	-3.78169	0.0212344
AMISG014219	MYO6	104.77	8.95267	-3.54876	0.0172186
AMISG014221	FILIP1L	34.4139	6.19802	-2.47311	0.0157388
AMISG014236	-	178.726	18.3262	-3.28577	0.0157388
AMISG014257	-	79.4874	6.98372	-3.50866	0.00204108
AMISG014293	ARSA	25.6461	4.79458	-2.41926	0.0248932
AMISG014353	RPL3	68.0451	6.08356	-3.4835	0.00204108
AMISG014517	KMT2D	12.9491	2.80873	-2.20486	0.0277031
AMISG014528	-	12.6324	1.39532	-3.17846	0.00816017
AMISG014532	-	1.95155	0.315873	-2.6272	0.0192798
AMISG014540	-	2.26612	0.503781	-2.16935	0.0391997
AMISG014555	CTDSPL	22.9562	4.19318	-2.45276	0.0334893
AMISG014590	-	36.6267	5.13302	-2.83501	0.0109457
AMISG014610	DNAJB2	247.47	50.0949	-2.30452	0.0248932
AMISG014630	PRIM1	140.297	31.3396	-2.16243	0.0224934
AMISG014684	FAM135B	5.90436	1.76393	-1.74299	0.0254788
AMISG014712	-	14.1242	3.93502	-1.84373	0.0368661
AMISG014755	-	3.68077	0	0	0.0282469
AMISG014797	SYNE2	7.44791	1.50014	-2.31174	0.00913986
AMISG014802	AKAP5	17.9207	4.67232	-1.93941	0.0334893
AMISG014805	-	2114.07	297.347	-2.82981	0.0334893
AMISG014856	TOMM40L	296.157	63.7541	-2.21577	0.0205944
AMISG014859	SND1	1451.37	170.39	-3.09051	0.0149937
AMISG014894	FKBP5	386.724	133.324	-1.53637	0.0499536
AMISG014912	PI16	32.8381	9.50211	-1.78905	0.0349672
AMISG014926	-	5.7962	0.737685	-2.97403	0.0314575
AMISG014935	SLC6A15	3.27817	0.559777	-2.54996	0.0309463
AMISG014947	AMIGO1	32.2702	5.44498	-2.5672	0.00487238
AMISG014985	CACNA1E	2.15716	0.376563	-2.51817	0.0423695
AMISG015020	LMOD1	123.88	8.00991	-3.95101	0.0334893
AMISG015039	-	141.54	10.006	-3.82227	0.0319616
AMISG015139	UNC79	1.67425	0.3163	-2.40415	0.0479451
AMISG015209	LRRC14	17.8978	3.79899	-2.23609	0.0441196
AMISG015219	ILK	750.1	93.524	-3.00367	0.0334893
AMISG015236	-	1500.25	306.465	-2.29141	0.0266267
AMISG015255	-	3.85924	0	0	0.00604775
AMISG015274	-	8.13216	2.1067	-1.94865	0.0445481
AMISG015280	-	532.62	16.8107	-4.98565	0.00487238
AMISG015310	ULK2	19.2857	6.36496	-1.59931	0.0432549
AMISG015323	CENPV	2966.5	467.083	-2.66701	0.0349672
AMISG015335	-	112.188	10.6805	-3.39287	0.00204108
AMISG015336	-	15.3137	0	0	0.00204108
AMISG015368	PYGB	4.55815	0.791327	-2.5261	0.0329831
AMISG015375	-	3.97263	0	0	0.0282469
AMISG015465	DSP	18.658	5.0351	-1.8897	0.0237082
AMISG015478	-	89.0327	13.9129	-2.67791	0.0109457
AMISG015488	-	12.3768	2.71322	-2.18956	0.0224934
AMISG015506	NDUFA1	1187.59	293.54	-2.01641	0.0445481
AMISG015509	NKAP	304.787	62.2251	-2.29223	0.0179141
AMISG015522	THOC2	209.84	29.9882	-2.80682	0.0387373
AMISG015530	-	67.3192	0	0	0.00204108
AMISG015577	-	10.7496	0.511398	-4.39369	0.0100622
AMISG015607	-	31.3624	7.77562	-2.01201	0.0334893
AMISG015708	PCDH9	97.4908	4.33161	-4.49229	0.0134561
AMISG015758	FKBP2	2209.42	205.346	-3.42754	0.0164845
AMISG015780	-	148.802	34.1695	-2.12262	0.0396667
AMISG015892	ZNF318	25.6412	7.41151	-1.79062	0.0495673
AMISG015901	POLH	174.942	41.3778	-2.07994	0.0373357
AMISG015915	-	45.6037	14.1816	-1.68513	0.0319616
AMISG015974	INO80	21.723	2.74562	-2.98402	0.00204108
AMISG015980	RTF1	848.089	61.7185	-3.78044	0.0118067
AMISG015988	MERTK	294.74	18.5067	-3.99332	0.00604775
AMISG016040	ETHE1	135.986	29.1963	-2.2196	0.0179141
AMISG016045	-	76.7856	11.755	-2.70756	0.0149937
AMISG016047	PLAUR	2.46059	0.287482	-3.09746	0.0359217
AMISG016055	SULT1ST6	67.9722	13.567	-2.32484	0.0266267
AMISG016070	RCE1	35.0072	6.8604	-2.35129	0.0298902
AMISG016087	-	102.181	14.3668	-2.83031	0.0186027
AMISG016097	PSIP1	189.879	40.4417	-2.23117	0.0445481
AMISG016100	-	4.43327	0	0	0.0282469
AMISG016140	-	31.6739	4.38075	-2.85405	0.0100622
AMISG016245	-	4.72958	0.668431	-2.82286	0.0363893
AMISG016255	TMEM214	111.047	21.9994	-2.33563	0.0172186
AMISG016267	-	10.3993	0	0	0.0282469
AMISG016304	ECE2	101.075	12.6808	-2.99471	0.00204108
AMISG016309	NOS2	13.7828	2.1749	-2.66385	0.0109457
AMISG016319	SSTR2	16.5084	2.30917	-2.83775	0.0359217
AMISG016326	SOX9	67.4484	4.30358	-3.97017	0.00204108
AMISG016339	MAP2K6	128.115	12.5682	-3.34959	0.00204108
AMISG016343	-	24.9161	5.23465	-2.25091	0.00356734
AMISG016349	SLC16A6	319.507	15.0237	-4.41054	0.00604775
AMISG016369	BPTF	8.94454	3.20451	-1.4809	0.0414854
AMISG016395	-	6.36978	0	0	0.0282469
AMISG016449	HEATR9-1	24.5823	2.6803	-3.19715	0.0126421
AMISG016526	QRICH2	3.31116	0.732147	-2.17713	0.0445481
AMISG016535	-	684.238	102.088	-2.74468	0.00816017
AMISG016550	-	159.99	22.3377	-2.84042	0.0441196
AMISG016553	RASL10A	31.7476	7.70936	-2.04196	0.0254788
AMISG016556	-	195.109	5.6146	-5.11895	0.0329831
AMISG016707	FAM71E1	203.164	11.9169	-4.09156	0.00204108
AMISG016726	RRP8	243.868	24.7491	-3.30065	0.00204108
AMISG016735	SLC23A2	26.3913	5.09536	-2.3728	0.0479451
AMISG016753	BNIP3L	48.5658	7.99195	-2.60332	0.0293426
AMISG016815	RAD51AP1	103.251	13.9903	-2.88366	0.00204108
AMISG016901	RILP	46.3948	4.03525	-3.52323	0.00816017
AMISG016903	BLVRB	822.205	72.5722	-3.50201	0.0205944
AMISG016938	TMEM198	112.036	13.2162	-3.08358	0.00356734
AMISG016944	-	26.8235	2.02419	-3.72808	0.00713776
AMISG016947	-	47.9905	6.01632	-2.9958	0.0218769
AMISG016967	-	508.136	53.9495	-3.23553	0.00204108
AMISG016970	RPUSD3	72.7937	14.0883	-2.36932	0.0179141
AMISG016991	-	74.2398	10.6117	-2.80654	0.00913986
AMISG017002	-	50.4815	7.18544	-2.81261	0.00356734
AMISG017049	SRPK3-2	64.92	4.36975	-3.89304	0.00204108
AMISG017074	PSMB9	156.004	33.516	-2.21866	0.0319616
AMISG017077	TAP2	10.3561	0	0	0.00204108
AMISG017101	CD40	190.356	11.7086	-4.02306	0.0205944
AMISG017105	-	71.9083	10.6603	-2.75391	0.0100622
AMISG017108	-	163.592	24.8829	-2.71688	0.00816017
AMISG017128	BRD4	160.317	22.0458	-2.86236	0.0212344
AMISG017140	RNF31	26.1835	6.09645	-2.10262	0.0487658
AMISG017162	-	559.564	43.5953	-3.68206	0.00204108
AMISG017166	-	57.8019	2.79402	-4.37071	0.00604775
AMISG017173	-	22.9601	3.64254	-2.65611	0.0172186
AMISG017178	PCED1A	14.6788	2.78459	-2.39819	0.0164845
AMISG017182	EFEMP2	633.246	96.8462	-2.709	0.0314575
AMISG017188	-	583.56	56.7147	-3.36309	0.0449682
AMISG017273	PRDX5	12082.3	1614.21	-2.904	0.0401211
AMISG017285	CCDC65	33.3261	4.67235	-2.83443	0.0354479
AMISG017286	FKBP11	393.872	44.1173	-3.15831	0.00204108
AMISG017309	IDO1	1.75994	0	0	0.0288014
AMISG017336	-	1191.66	185.375	-2.68446	0.0423695
AMISG017339	TYMP	106.595	16.0843	-2.72842	0.00356734
AMISG017395	-	7.55957	0.855396	-3.14364	0.0205944
AMISG017407	PREB	83.5824	16.8117	-2.31373	0.0212344
AMISG017431	-	233.536	8.49158	-4.78147	0.00204108
AMISG017506	INHBA	33.4254	4.34941	-2.94205	0.00604775
AMISG017553	BMPER	6.34379	0.754624	-3.07151	0.0449682
AMISG017577	-	13.3542	1.43177	-3.22142	0.0324731
AMISG017608	CLEC3B	35.1638	4.61196	-2.93064	0.0224934
AMISG017647	IFI16	45.6171	6.5987	-2.78932	0.0298902
AMISG017655	CADM3-1	64.0835	16.0755	-1.99509	0.0349672
AMISG017666	CD3EAP	49.4062	6.9338	-2.83297	0.00713776
AMISG017667	ERCC1	1419.16	145.811	-3.28287	0.00913986
AMISG017700	POU6F1	49.7556	4.73798	-3.39251	0.00204108
AMISG017710	FAIM2	210.009	11.5201	-4.18823	0.00204108
AMISG017748	-	378.672	54.6974	-2.7914	0.0466855
AMISG017756	-	54.9733	4.76177	-3.52916	0.0157388
AMISG017799	-	11.3851	0	0	0.00204108
AMISG017839	-	215.701	15.5152	-3.79728	0.0149937
AMISG017861	ZDHHC16-1	125.697	16.493	-2.93002	0.0432549
AMISG017868	ST5	25.2093	4.84249	-2.38014	0.0298902
AMISG017873	TSHB	7.18723	0	0	0.00204108
AMISG018063	CRYBA2	22.0545	1.64246	-3.74714	0.0298902
AMISG018065	NXF1L	1372.49	128.772	-3.4139	0.0157388
AMISG018071	TMEM8B-2	27.4687	4.11376	-2.73926	0.0126421
AMISG018072	DXO	2339.99	100.687	-4.53855	0.0118067
AMISG018092	-	4.52236	0.621556	-2.86312	0.0349672
AMISG018094	-	20.2631	3.88068	-2.38447	0.0428157
AMISG018108	-	62.9965	0	0	0.00204108
AMISG018155	STAR	1445.26	269.353	-2.42376	0.00356734
AMISG018159	NPFFR1L2	23.9228	4.19687	-2.511	0.00487238
AMISG018169	NUDT18	30.0015	6.09316	-2.29977	0.0339876
AMISG018173	-	2.04268	0	0	0.00816017
AMISG018221	-	20.5986	2.34205	-3.1367	0.0324731
AMISG018223	-	23.9729	4.09029	-2.55113	0.0224934
AMISG018229	-	20.4096	4.28218	-2.25283	0.0428157
AMISG018261	-	7.80166	1.90245	-2.03592	0.0471124
AMISG018328	CYB561	195.963	56.4512	-1.7955	0.0309463
AMISG018354	HDAC4	11.9566	3.46373	-1.78741	0.0495673
AMISG018357	-	42.1472	3.55076	-3.56924	0.00204108
AMISG018381	-	389.062	38.7711	-3.32695	0.0118067
AMISG018413	HCRT	166.607	7.95613	-4.38824	0.00204108
AMISG018419	-	61.6845	10.1291	-2.6064	0.0410227
AMISG018442	KRT14	15.6676	0.957587	-4.03224	0.00204108
AMISG018451	KRT19	9.5575	2.95594	-1.69302	0.0449682
AMISG018477	THRA	23.2382	3.33777	-2.79954	0.0298902
AMISG018501	CTU1	55.9285	4.63445	-3.59311	0.00204108
AMISG018527	PCGF1	103.093	15.4343	-2.73974	0.00604775
AMISG018531	-	51.4231	12.9951	-1.98445	0.0248932
AMISG018592	-	18.0739	2.77193	-2.70495	0.0248932
AMISG018730	NAA25	17.044	4.55442	-1.90393	0.0419301
AMISG018740	MYL2	177.757	17.454	-3.34828	0.00204108
AMISG018814	JTB	242.472	52.244	-2.21448	0.0288014
AMISG018825	SIRT7	273.492	19.958	-3.77646	0.0293426
AMISG018834	MDP1	723.344	61.4065	-3.55822	0.0248932
AMISG018888	CEP85L	17.4768	1.10151	-3.98789	0.0134561
AMISG018927	-	17.0908	0	0	0.00604775
AMISG018929	HINT3	148.297	21.2407	-2.80359	0.0142304
AMISG018936	RSPO3	70.1674	10.4484	-2.74752	0.00913986
AMISG018940	SOGA3	27.0555	4.7396	-2.51308	0.0126421
AMISG018989	AHI1	11.1176	2.58729	-2.10333	0.0298902
AMISG019139	FAM133B	153.437	28.8179	-2.41261	0.0231024
AMISG019250	-	5.33448	0	0	0.0282469
AMISG019285	HOXA9	286.933	65.001	-2.14218	0.0382801
AMISG019557	-	251.784	44.9257	-2.48658	0.0277031
AMISG019581	GAS8	126.513	15.6257	-3.01729	0.00204108
AMISG019598	-	50.7272	3.78626	-3.74391	0.00487238
AMISG019667	PTPRZ1	9.15564	1.9606	-2.22336	0.0172186
AMISG019688	CTTNBP2	18.8729	2.78846	-2.75878	0.00913986
AMISG019739	ZCRB1	96.2902	10.8879	-3.14466	0.00356734
AMISG019864	-	2.27816	0.470651	-2.27514	0.0293426
AMISG019869	PPP1R12A	31.7252	4.1441	-2.9365	0.00713776
AMISG019895	-	107.886	20.3049	-2.40961	0.00204108
AMISG019910	NDUFA4L2	224.13	33.9441	-2.7231	0.0134561
AMISG019975	ALG13L	160.432	22.8125	-2.81406	0.00204108
AMISG020016	-	11.5915	2.11537	-2.45408	0.0179141
AMISG020028	-	74.9859	10.1485	-2.88535	0.0205944
AMISG020066	UBN2	5.24666	0.740351	-2.82512	0.0192798
AMISG020089	-	6.13188	0	0	0.00604775
AMISG020097	-	44.0255	11.1747	-1.9781	0.0224934
AMISG020146	-	496.89	45.684	-3.44317	0.034486
AMISG020158	-	20.6002	5.93738	-1.79476	0.0436786
AMISG020175	EXOSC1	400.391	71.66	-2.48217	0.0126421
AMISG020192	TAF6L	71.274	16.7469	-2.08948	0.0324731
AMISG020220	ITSN1	22.1783	4.61503	-2.26473	0.00204108
AMISG020231	-	11.3287	2.28362	-2.31059	0.0134561
AMISG020287	PLAGL2	31.7046	5.21414	-2.60419	0.0179141
AMISG020297	BPIFB2	2.66118	0	0	0.00204108
AMISG020321	CDK20	185.162	33.0802	-2.48474	0.0100622
AMISG020376	WFIKKN1	46.9031	17.9178	-1.38829	0.0487658
AMISG020394	-	70.0435	21.7882	-1.6847	0.0199504
AMISG020422	WDR90	9.379	3.18016	-1.56034	0.0499536
AMISG020495	TLCD1	107.474	21.1726	-2.34372	0.0260507
AMISG020503	-	3.05273	0	0	0.00604775
AMISG020508	TAC3	168.826	24.8559	-2.76388	0.00487238
AMISG020510	B4GAT1	63.6454	5.7886	-3.45877	0.00204108
AMISG020540	NACAD	85.7465	6.23049	-3.78266	0.0142304
AMISG020554	-	26.9878	2.89838	-3.21899	0.00356734
AMISG020564	MORN4	251.659	46.456	-2.43754	0.0126421
AMISG020575	XRRA1	25.26	5.76947	-2.13034	0.0118067
AMISG020582	DNAJB13	55.9489	10.2706	-2.44559	0.0157388
AMISG020610	UBE2C	140.818	32.8549	-2.09965	0.0495673
AMISG020629	SSSCA1	262.262	45.3953	-2.53039	0.00816017
AMISG020652	-	24.4298	7.44724	-1.71387	0.0354479
AMISG020666	-	535.75	81.3249	-2.71979	0.00713776
AMISG020694	-	425.618	33.2027	-3.68019	0.00204108
AMISG020752	FXYD5	322.562	28.2561	-3.51294	0.00204108
AMISG020753	FXYD7	269.605	7.51008	-5.16588	0.0134561
AMISG020783	AIFM3L	31.4227	6.05268	-2.37616	0.0157388
AMISG020796	PVRL2	22.9457	4.68436	-2.2923	0.0359217
AMISG020808	-	54.9849	11.785	-2.22208	0.0499536
AMISG020990	-	4.20865	0.415225	-3.34139	0.0314575
AMISG020995	MOV10	3.57124	0.497728	-2.843	0.0391997
AMISG021020	-	188.495	24.7146	-2.93109	0.00913986
AMISG021144	-	54.7296	4.54927	-3.58862	0.00204108
AMISG021157	-	18.1872	2.60491	-2.80362	0.0109457
AMISG021543	LIMCH1	62.8042	4.75721	-3.72267	0.0109457
AMISG021612	-	21.5816	2.37264	-3.18524	0.00204108
AMISG021701	-	2.31477	0	0	0.0282469
AMISG021813	MAP9-1	67.367	3.80782	-4.145	0.0118067
AMISG021814	NPY2R	24.6313	5.22865	-2.23598	0.0277031
AMISG021866	ZNF827	11.7757	2.4658	-2.25569	0.0309463
AMISG021871	-	436.621	46.6108	-3.22764	0.00204108
AMISG021872	-	11.2954	0	0	0.00816017
AMISG021979	EPB42	96.3745	15.375	-2.64806	0.00356734
AMISG022051	CFHR2	57.8815	10.2863	-2.49238	0.00204108
AMISG022088	ACTN2	3.58982	0.515433	-2.80005	0.0491647
AMISG022303	CCAR1	170.982	41.2808	-2.05031	0.0396667
AMISG022343	HEXDCL	28.374	6.28972	-2.1735	0.0479451
AMISG022369	-	17.2375	0	0	0.00356734
AMISG022429	MAP7D2	34.4297	6.05705	-2.50697	0.0134561
AMISG022509	RBM28	22.568	5.03892	-2.16309	0.0382801
AMISG022546	AKAP17A	30.368	3.97789	-2.93247	0.00604775
AMISG022661	BRD9	91.6294	15.7162	-2.54356	0.0186027
AMISG022720	PRR7	114.857	15.5794	-2.88213	0.0298902
AMISG022778	-	27.6437	4.1934	-2.72076	0.0126421
AMISG022783	MLEC	11.4793	2.4005	-2.25763	0.0382801
AMISG022862	NEFH	32.8427	9.04797	-1.85991	0.00487238
AMISG022928	-	21.8898	4.56329	-2.26211	0.0224934
AMISG022971	MPHOSPH8	169.077	14.2994	-3.56365	0.034486
AMISG022984	-	7.80952	0	0	0.0282469
AMISG023030	ANGPTL5	10.6114	1.37088	-2.95245	0.0334893
AMISG023100	ZBTB9	115.94	14.5026	-2.999	0.00487238
AMISG023244	-	4.31656	0	0	0.0298902
AMISG023260	RCC2	73.9462	17.0631	-2.11559	0.0231024
AMISG023271	-	18.0674	3.00571	-2.58761	0.0142304
AMISG023323	-	10.7762	2.89263	-1.89739	0.0479451
AMISG023326	-	156.4	18.1295	-3.10883	0.0126421
AMISG023357	-	127.687	13.2715	-3.26621	0.0142304
AMISG023406	-	2.45771	0.342386	-2.84362	0.0231024
AMISG023444	UPF2	86.3866	15.8914	-2.44256	0.0339876
AMISG023480	-	6.6649	1.84874	-1.85004	0.0419301
AMISG023561	PDIK1L	37.013	3.58988	-3.36602	0.00204108
AMISG023566	PAQR7	175.083	33.569	-2.38283	0.0186027
AMISG023568	-	199.747	35.9748	-2.47312	0.00356734
AMISG023585	SRRM1	163.81	44.1566	-1.89132	0.0363893
AMISG023620	-	7.56222	2.36735	-1.67553	0.0410227
AMISG023640	FAM229A	7.47991	0	0	0.0282469
AMISG023648	MTMR9	43.8229	5.25919	-3.05877	0.0100622
AMISG023789	-	9.39668	0	0	0.00204108
AMISG023815	RYBP	38.4604	3.53141	-3.44506	0.00487238
AMISG023886	P4HTM	131.512	31.256	-2.07299	0.037803
AMISG023887	WDR6	13.4944	1.83054	-2.88202	0.00204108
AMISG023901	NGDN	35.5652	3.51985	-3.33688	0.00204108
AMISG023905	DPH1	99.6449	19.3425	-2.36502	0.0254788
AMISG023929	PPRC1	20.4528	1.07628	-4.24817	0.00204108
AMISG023936	PSMB6	1526.1	194.965	-2.96856	0.0329831
AMISG023979	-	8.55354	1.14645	-2.89935	0.0483608
AMISG024030	TOB2	291.12	14.8881	-4.28938	0.0172186
AMISG024037	CHADL	35.3554	4.58453	-2.94709	0.00913986
AMISG024077	NPTXR	20.2847	3.60425	-2.49262	0.00604775
AMISG024087	-	116.158	32.4316	-1.84061	0.0212344
AMISG024107	-	30.3386	6.30337	-2.26696	0.0186027
AMISG024122	ELFN2	6.35568	0.959379	-2.72787	0.00356734
AMISG024140	CACNG2	36.7581	2.69086	-3.77192	0.00713776
AMISG024151	HMGXB4	67.7784	8.40356	-3.01175	0.00713776
AMISG024166	PWP1	215.926	18.8123	-3.52079	0.0410227
AMISG024287	-	3.71989	0.61074	-2.60663	0.0243004
AMISG024310	-	5.58759	1.12699	-2.30975	0.0149937
AMISG024322	PEX26	36.5627	10.2775	-1.83089	0.0410227
AMISG024330	CALD1-1	495.557	82.7426	-2.58235	0.0499536
AMISG024421	-	187.669	31.6012	-2.57014	0.0126421
AMISG024653	MEGF6	3.0278	0.775721	-1.96466	0.045404
AMISG024663	SEC62	313.139	69.0272	-2.18157	0.0224934

## Sheet: Adrenal 3d Female-biased
Gene ID	Gene symbol	Mean male expression (FPKM)	Mean female expression (FPKM)	Log2 fold change	FDR-adjusted p-value
AMISG000620	-	3.54244	18.8131	2.40892	0.0126421
AMISG000642	-	3.06422	12.3247	2.00796	0.0466855
AMISG000700	-	2.03627	7.61857	1.90359	0.0260507
AMISG001033	PTBP3	5.57122	19.2815	1.79115	0.0354479
AMISG001334	-	0.843807	4.37105	2.373	0.0164845
AMISG001402	-	1.32858	6.68711	2.33149	0.0288014
AMISG001457	SECISBP2L	2.16011	8.42468	1.96352	0.0368661
AMISG001487	-	1.66441	6.11103	1.8764	0.037803
AMISG001998	RBM24	0	1.31651	0	0.00713776
AMISG003295	-	0.454892	2.59734	2.51344	0.0293426
AMISG003327	BACE2	5.79091	21.8266	1.91423	0.0405744
AMISG004015	FCHO2	4.85846	15.777	1.69925	0.0491647
AMISG004119	-	1.30812	7.79106	2.57433	0.00356734
AMISG004153	-	6.24613	23.278	1.89793	0.0142304
AMISG004885	-	1.4334	12.3458	3.10651	0.00713776
AMISG005823	-	0.599229	3.67623	2.61705	0.00604775
AMISG006008	-	0.498388	2.51935	2.33771	0.0466855
AMISG006024	SKI	0.615268	5.6108	3.18892	0.0179141
AMISG006169	-	0.8202	5.28675	2.68833	0.00487238
AMISG006254	-	3.02638	9.82161	1.69837	0.0471124
AMISG006344	-	22.7615	77.1976	1.76196	0.0423695
AMISG006562	-	1.34524	6.99747	2.37898	0.0118067
AMISG007045	COL26A1-1	3.57085	21.3203	2.57788	0.0324731
AMISG007465	SLC30A7	6.18618	23.283	1.91216	0.0491647
AMISG007940	TMX3	3.65214	14.3396	1.97319	0.0391997
AMISG008279	LMTK2	1.27723	8.08422	2.66209	0.0382801
AMISG008526	BCL2L11-1	0	1.50166	0	0.00204108
AMISG008829	GLS	11.7208	40.9438	1.80457	0.0324731
AMISG009763	-	1.17645	8.61546	2.87249	0.0126421
AMISG009815	PRLR	4.69615	18.1751	1.95241	0.0199504
AMISG009837	LIFR	0.863322	4.13679	2.26054	0.0288014
AMISG009839	RICTOR	0.348169	2.40868	2.79038	0.0218769
AMISG009901	-	0.942298	4.59678	2.28637	0.00913986
AMISG009921	MAP3K1	8.36691	30.8208	1.88114	0.0277031
AMISG010213	CDON	4.08456	13.7291	1.74898	0.0382801
AMISG010782	NR3C1	4.43548	18.7775	2.08184	0.0401211
AMISG010793	AFF1L	1.42829	5.98525	2.06712	0.0387373
AMISG011076	-	0	2.22295	0	0.0271527
AMISG011249	PXDNL	3.70099	28.0034	2.91962	0.00204108
AMISG011919	LMNB1	4.5521	18.2728	2.0051	0.0237082
AMISG012578	-	0	12.1079	0	0.00487238
AMISG012699	ERMP1	4.40764	14.083	1.67588	0.0462558
AMISG012710	PTPRA	1.64512	5.34363	1.69963	0.0483608
AMISG013438	PAN3	4.60237	15.9547	1.79353	0.0479451
AMISG013467	-	3.82752	15.636	2.03039	0.0126421
AMISG013622	PTPN14	0.303745	2.97143	3.29023	0.0186027
AMISG013625	PROX1	0.614326	4.33675	2.81954	0.0288014
AMISG014149	RNGTT	5.07748	18.5622	1.87018	0.0499536
AMISG014493	-	4.96221	18.1364	1.86983	0.0487658
AMISG015118	DICER1	1.66718	8.56117	2.36039	0.00204108
AMISG015524	XIAP	6.52918	21.2507	1.70254	0.0475258
AMISG017249	EDNRB	7.06043	37.197	2.39736	0.00816017
AMISG017467	-	1.26412	5.99766	2.24627	0.0266267
AMISG018891	CEP85LL	0	1.71248	0	0.0192798
AMISG019808	DYRK2	1.62277	6.96602	2.10188	0.0432549
AMISG021530	N4BP2-1	1.64288	6.76585	2.04205	0.0164845
AMISG021549	-	1.27183	6.46092	2.34483	0.0248932
AMISG021646	ASAH1	8.73752	35.794	2.03442	0.0288014
AMISG021656	FAT3A	1.02339	6.56449	2.68133	0.00816017
AMISG022145	KNDC1	0.740594	2.91668	1.97757	0.0471124
AMISG022404	-	1.88176	9.5946	2.35014	0.0432549
AMISG022420	PHEX	2.50818	11.2493	2.16512	0.0387373
AMISG022666	SLC9A3	0.967222	5.90945	2.6111	0.0186027
AMISG022758	-	1.59688	5.81987	1.86573	0.0354479
AMISG023027	YAP1	13.0792	52.8349	2.01422	0.0441196
AMISG023397	-	1.95949	7.91603	2.0143	0.0304148
AMISG023806	-	1.04237	5.57278	2.41853	0.0118067
AMISG023821	FOXP1A	1.67782	6.38744	1.92865	0.0491647
AMISG024523	XRN1	1.77573	8.57487	2.27171	0.0192798
AMISG024557	WWTR1	4.26955	23.3238	2.44965	0.0293426
AMISG024691	-	8.71604	29.1477	1.74164	0.0248932

## Sheet: Adrenal 3d Male-biased
Gene ID	Gene symbol	Mean male expression (FPKM)	Mean female expression (FPKM)	Log2 fold change	FDR-adjusted p-value
AMISG000795	S100A16	140.702	46.7575	-1.58937	0.0475258
AMISG000877	-	14.1979	0.68137	-4.38109	0.0405744
AMISG004013	TMEM174	775.805	283.028	-1.45475	0.0471124
AMISG005032	-	346.496	115.359	-1.5867	0.0471124
AMISG006060	SS2	281.072	49.4779	-2.50608	0.00913986
AMISG006610	SENP3	380.296	95.6541	-1.99122	0.0157388
AMISG007680	-	324.445	97.7422	-1.73092	0.045404
AMISG007966	-	6.01229	0	0	0.0462558
AMISG008249	-	5.3294	0	0	0.0199504
AMISG008728	PRLHL	115.967	16.2232	-2.83759	0.00204108
AMISG010283	CATH2	54.3515	12.702	-2.09727	0.0354479
AMISG015124	-	45.3298	11.5247	-1.97572	0.0458427
AMISG016036	BLOC1S1	599.362	180.323	-1.73285	0.0387373
AMISG016779	PEBP4-1	422.622	129.091	-1.71098	0.0368661
AMISG017669	-	5.68943	0	0	0.0466855
AMISG021289	FABP1	191.314	38.2216	-2.32348	0.0142304
AMISG024117	LGALS2	703.271	215.362	-1.70731	0.0304148

## Sheet: Mesonephros 30d Female-biased
Gene ID	Gene symbol	Mean male expression (FPKM)	Mean female expression (FPKM)	Log2 fold change	FDR-adjusted p-value
AMISG000151	0	14.1264	141.767	3.32706	0.00204108
AMISG000167	GUCA2B	46.316	407.72	3.138	0.00204108
AMISG000202	ATP6V1B2	118.384	310.547	1.39134	0.0368661
AMISG000424	ARG2	36.2245	634.452	4.13047	0.00204108
AMISG000581	LUZP2	62.6517	159.188	1.3453	0.0324731
AMISG000718	HPS5L	0	6.13363	0	0.00204108
AMISG000719	0	0	4.55506	0	0.00204108
AMISG000792	S100A1	128.12	337.62	1.3979	0.0329831
AMISG000843	PXMP2	212.173	497.867	1.23052	0.0359217
AMISG001140	AADACL4	52.8079	118.974	1.17182	0.0363893
AMISG001646	0	29.2763	86.9954	1.57121	0.0475258
AMISG001729	0	38.0954	117.486	1.6248	0.0304148
AMISG002442	0	13.7678	51.5532	1.90476	0.00487238
AMISG002696	0	22.1396	71.2975	1.68722	0.0100622
AMISG002709	AURKA	7.16764	22.0577	1.62171	0.0199504
AMISG002971	APOV1	151.226	464.623	1.61936	0.0212344
AMISG003057	0	449.726	1557.93	1.79251	0.00204108
AMISG003247	CLDN8	86.8089	247.449	1.51122	0.0118067
AMISG003708	FABP4	113.603	273.598	1.26806	0.0436786
AMISG003832	SDR16C5-2	3.61004	12.2774	1.76592	0.0218769
AMISG003908	MEP1B	10.4015	32.6537	1.65045	0.0260507
AMISG003915	TTR	7.02047	84.3886	3.58741	0.00204108
AMISG004186	CDO1	24.7125	181.549	2.87705	0.00204108
AMISG005032	0	198.902	1439.78	2.85572	0.00204108
AMISG005087	0	81.9461	243.914	1.57363	0.0373357
AMISG005088	GLYATL3	78.4023	276.95	1.82066	0.00816017
AMISG005531	0	72.5869	191.002	1.39581	0.0458427
AMISG005582	0	3.3429	17.9871	2.42779	0.0401211
AMISG005871	EPHX2	139.375	410.845	1.55963	0.0354479
AMISG005926	HBZ	552.948	2899.62	2.39065	0.00204108
AMISG006045	NPPC	2.6175	55.3691	4.40282	0.0212344
AMISG006286	0	150.229	627.853	2.06327	0.0100622
AMISG006627	0	22.7349	66.3681	1.54558	0.0363893
AMISG006712	HMGCS2	48.4208	142.331	1.55555	0.0205944
AMISG006767	0	6.45286	21.1464	1.7124	0.0142304
AMISG006892	CHRM1	10.4004	31.954	1.61936	0.0339876
AMISG007249	0	0	11.1172	0	0.0100622
AMISG007472	LRRC39	0.698739	7.64033	3.45081	0.0334893
AMISG007550	CCBL2	57.1945	160.131	1.48531	0.0199504
AMISG007815	RRAD	12.0179	40.5332	1.75392	0.0205944
AMISG007897	0	0	7.5729	0	0.00204108
AMISG008240	PDILT	63.0974	268.512	2.08933	0.00356734
AMISG008302	CYP2W1	1.65408	15.4147	3.22021	0.00204108
AMISG008306	ZFAND2A	21.1828	109.323	2.36764	0.00204108
AMISG008420	0	0	7.12886	0	0.00204108
AMISG008751	0	52.1112	169	1.69736	0.0100622
AMISG008785	0	27.5394	113.225	2.03962	0.00204108
AMISG008875	0	8.45141	60.4058	2.83742	0.00204108
AMISG009008	0	10.5245	33.1365	1.65467	0.0445481
AMISG009125	0	37.3378	145.815	1.96543	0.00204108
AMISG009661	HSD11B2	230.543	688.479	1.57837	0.0100622
AMISG010059	SLC27A5	12.2793	35.701	1.53974	0.0126421
AMISG010190	KCNJ1	17.8854	53.0931	1.56974	0.0157388
AMISG010283	CATH2	50.8571	642.915	3.66011	0.00204108
AMISG010284	0	60.6712	480.182	2.9845	0.00204108
AMISG010500	SLC24A4	2.02189	6.4667	1.67732	0.0324731
AMISG010906	SLC6A7	1.09587	3.90558	1.83345	0.0441196
AMISG011415	0	0	1.90713	0	0.00816017
AMISG011687	ACMSD	2.05054	33.5303	4.03139	0.00204108
AMISG011777	0	0	17.866	0	0.0339876
AMISG012140	0	0	8.54898	0	0.00204108
AMISG012274	CXCL10	147.296	482.563	1.712	0.00816017
AMISG012312	TM6SF2-1	19.1821	50.7178	1.40273	0.0373357
AMISG012344	SELENBP1	59.7177	159.302	1.41553	0.0118067
AMISG012487	0	0	9.13635	0	0.00816017
AMISG012535	AUH	69.4986	184.523	1.40875	0.0298902
AMISG012582	FBP1	718.664	2421.39	1.75245	0.0339876
AMISG012700	MLANA	12.1459	62.0348	2.35261	0.00204108
AMISG013145	GZMB	0	4.06887	0	0.00204108
AMISG013323	LPO	3.5614	44.4653	3.64216	0.00204108
AMISG013400	METRNL	51.693	134.704	1.38175	0.0192798
AMISG013539	CAPN13-1	0.815848	3.63943	2.15734	0.0179141
AMISG013791	0	0	5.54905	0	0.00204108
AMISG014065	SLC13A5	11.9304	65.9784	2.46735	0.00204108
AMISG014718	LYPD2	12.7491	73.0822	2.51912	0.0126421
AMISG014855	APOA2	2518.36	11723	2.21879	0.00204108
AMISG016090	0	0	8.81195	0	0.0304148
AMISG016221	SLAMF9	59.7404	284.272	2.25049	0.00204108
AMISG017690	ALOX5	0.846439	6.23232	2.88029	0.00604775
AMISG018715	DAO	194.483	675.107	1.79547	0.00816017
AMISG019241	0	17.7355	65.6139	1.88736	0.00204108
AMISG019446	BDH2	142.71	350.441	1.29608	0.0254788
AMISG019802	TMBIM4	55.783	139.111	1.31834	0.0373357
AMISG019811	0	0	5.81681	0	0.0266267
AMISG019965	0	3.58098	16.6015	2.21289	0.0271527
AMISG020672	0	222.355	521.139	1.22881	0.0363893
AMISG021288	THNSL2	13.4705	36.958	1.45609	0.0218769
AMISG021308	0	0	2.32617	0	0.00204108
AMISG021502	0	0	3.43269	0	0.034486
AMISG021542	UCHL1	107.69	362.132	1.74963	0.00204108
AMISG022151	DNTT	3.46172	11.0963	1.68052	0.0266267
AMISG022587	0	15.2933	121.827	2.99387	0.00204108
AMISG022738	0	0	3.14219	0	0.00487238
AMISG022844	SDSL	26.0869	112.695	2.11103	0.00204108
AMISG022945	0	6.34014	31.6087	2.31773	0.00204108
AMISG022968	GSTK1	260.648	604.608	1.21389	0.0423695
AMISG022993	ACAT1	208.265	546.362	1.39143	0.0363893
AMISG023319	GTSE1	5.23152	18.7438	1.84111	0.00604775
AMISG023683	CCND3	27.1083	64.2888	1.24584	0.0414854
AMISG023875	FAM3D	32.1761	80.1627	1.31694	0.045404
AMISG024388	GYS1	2.4409	8.631	1.82211	0.0142304

## Sheet: Mesonephros 30d Male-biased
Gene ID	Gene symbol	Mean male expression (FPKM)	Mean female expression (FPKM)	Log2 fold change	FDR-adjusted p-value
AMISG000027	RPGR	7.14824	2.80925	-1.3474	0.0428157
AMISG000293	CFD	106.886	22.3311	-2.25894	0.0142304
AMISG000588	CCDC34	424.983	112.609	-1.91608	0.00204108
AMISG000725	SPTY2D1	127.935	29.0442	-2.13908	0.0164845
AMISG000775	-	6.37244	0.878376	-2.85894	0.00204108
AMISG000966	-	2.78816	1.02115	-1.44911	0.0277031
AMISG001093	-	274.891	66.8723	-2.03938	0.0423695
AMISG001155	TTC39A	31.4897	11.3848	-1.46777	0.0205944
AMISG001205	-	2.54469	0.715478	-1.83051	0.034486
AMISG001357	CHD2	28.6705	7.54222	-1.92651	0.0109457
AMISG001364	AKAP13-1	8.22004	2.9437	-1.48152	0.0359217
AMISG001407	-	31.5509	12.3593	-1.35208	0.0359217
AMISG001411	TMC3	2.50006	0.496321	-2.33262	0.0126421
AMISG001504	DYX1C1	27.2335	10.6068	-1.36039	0.0432549
AMISG001600	RORA	12.0046	2.68935	-2.15825	0.0243004
AMISG001609	KLF13-1	19.7752	4.86772	-2.02237	0.0149937
AMISG001665	SHF	9.2021	2.56826	-1.84117	0.0382801
AMISG001708	-	22.3492	7.12634	-1.64899	0.034486
AMISG001725	ZP3	44.7724	15.5333	-1.52724	0.0271527
AMISG001727	CEP131	22.9357	8.24694	-1.47567	0.0349672
AMISG001749	COL16A1	14.0564	4.61471	-1.60692	0.00816017
AMISG001798	LRRC18	402.876	128.943	-1.6436	0.0231024
AMISG001851	-	31.8848	8.52241	-1.90353	0.0172186
AMISG001910	TMEM200B	35.2459	11.12	-1.6643	0.00487238
AMISG001930	ZCCHC17	412.146	104.244	-1.98319	0.00713776
AMISG001965	-	103.274	32.4328	-1.67095	0.0282469
AMISG001999	STMND1	15.565	1.73964	-3.16145	0.0118067
AMISG002060	-	46.454	14.8952	-1.64095	0.0304148
AMISG002141	REST	23.48	6.09969	-1.94462	0.00487238
AMISG002146	THEGL	75.49	13.0121	-2.53643	0.00204108
AMISG002283	-	21.1749	2.72303	-2.95907	0.0271527
AMISG002366	ANKEF1	8.24166	2.70131	-1.60928	0.0475258
AMISG002393	CHGB	218.206	66.0236	-1.72464	0.0237082
AMISG002449	MLN	40.006	5.1153	-2.96733	0.00356734
AMISG002479	SLC18A2	4.95568	1.12166	-2.14345	0.0423695
AMISG002484	DUSP26	11.7667	2.91546	-2.01291	0.0499536
AMISG002495	HR-1	15.9539	6.00843	-1.40885	0.037803
AMISG002796	MATN4	12.2381	0.428837	-4.8348	0.0109457
AMISG002801	DBNDD2	114.195	28.527	-2.0011	0.0134561
AMISG002837	-	11.835	4.23395	-1.48298	0.0149937
AMISG003059	MORC1L	12.9004	4.33045	-1.57482	0.034486
AMISG003072	BBX	59.2194	10.682	-2.47089	0.0157388
AMISG003097	ABI3BP	2.98286	0.451278	-2.72461	0.00356734
AMISG003232	-	58.3338	14.6544	-1.99299	0.0100622
AMISG003271	GART	12.2923	2.10135	-2.54837	0.0248932
AMISG003351	PIGRL	56.4992	20.3706	-1.47174	0.0109457
AMISG003483	AGBL4-2	15.6158	3.80531	-2.03692	0.0458427
AMISG003666	CALB2	27.4979	5.02603	-2.45183	0.0172186
AMISG003668	HYDIN	3.75774	1.41655	-1.40749	0.037803
AMISG003773	CSPP1	15.9756	4.37667	-1.86797	0.00604775
AMISG003810	-	13.179	3.30599	-1.99508	0.0109457
AMISG003918	-	10.7336	0	0	0.0237082
AMISG004022	-	203.858	25.1985	-3.01616	0.0271527
AMISG004027	BDP1-1	28.7464	5.00649	-2.52151	0.00356734
AMISG004129	-	49.7295	17.5568	-1.50207	0.0414854
AMISG004212	TMEM145	25.2922	9.45609	-1.41938	0.045404
AMISG004231	SART1L	192.265	75.7413	-1.34395	0.0462558
AMISG004280	LAMC1	12.7689	3.6265	-1.81599	0.00913986
AMISG004353	-	1161.23	383.946	-1.59668	0.0419301
AMISG004354	-	536.401	98.9882	-2.43798	0.00913986
AMISG004516	ECM1	62.0546	16.634	-1.8994	0.00604775
AMISG004807	UGDH	6.68889	1.33633	-2.3235	0.0334893
AMISG004874	KCNMB1	342.571	123.894	-1.4673	0.0462558
AMISG005219	-	1758.12	550.412	-1.67545	0.0363893
AMISG005383	MFAP4	160.421	15.2569	-3.39433	0.00204108
AMISG005389	-	41.6959	9.97806	-2.06307	0.0224934
AMISG005487	-	27.5814	7.61728	-1.85635	0.00487238
AMISG005490	-	1816.18	549.131	-1.72568	0.0288014
AMISG005613	-	4.18301	0.888207	-2.23558	0.00356734
AMISG005643	-	73.9006	23.9936	-1.62294	0.0339876
AMISG005733	CEL	9.83521	2.00795	-2.29224	0.0179141
AMISG005750	DBH	31.3037	7.35526	-2.08949	0.00204108
AMISG005754	BRD3A	20.2118	3.21732	-2.65127	0.00204108
AMISG005765	-	54.8485	12.8091	-2.09829	0.00204108
AMISG005831	CRB2	5.25051	1.02926	-2.35085	0.0391997
AMISG005984	-	9.83939	3.78761	-1.37728	0.0324731
AMISG006001	-	6.02598	1.11107	-2.43925	0.0271527
AMISG006102	AGRN	9.98997	3.13563	-1.67173	0.0329831
AMISG006107	-	44.5344	11.687	-1.93001	0.00204108
AMISG006128	MXRA8	85.0847	31.355	-1.4402	0.0254788
AMISG006202	ST6GAL2	3.7237	0.741241	-2.32872	0.0479451
AMISG006257	VWA3B	12.5916	4.24408	-1.56894	0.0231024
AMISG006319	-	5.74578	1.84964	-1.63526	0.0339876
AMISG006383	INCENPL	7.20968	2.68433	-1.42537	0.0479451
AMISG006412	-	34.0385	9.36173	-1.86232	0.0248932
AMISG006444	TCNL	61.9861	13.983	-2.14827	0.0432549
AMISG006445	-	50.8151	9.27997	-2.45307	0.00204108
AMISG006511	CNN1	38.3299	12.3325	-1.636	0.0436786
AMISG006550	-	2.33084	0.168314	-3.79162	0.0309463
AMISG006786	-	29.0282	4.23072	-2.77848	0.00487238
AMISG006958	ECM2	19.1031	6.08938	-1.64944	0.0243004
AMISG007027	HSPB1	205.705	44.9119	-2.19541	0.00204108
AMISG007083	-	8.9372	3.19393	-1.48449	0.0462558
AMISG007109	TEKT1	27.2607	10.6267	-1.35914	0.0363893
AMISG007123	-	110.769	15.5198	-2.83538	0.00204108
AMISG007219	TEX14	1.50458	0.313513	-2.26276	0.0334893
AMISG007220	-	2.67099	0	0	0.00204108
AMISG007408	-	21.2282	7.44257	-1.51211	0.0126421
AMISG007509	-	1.28609	0.239758	-2.42334	0.00816017
AMISG007673	FAHD2A	702.554	212.77	-1.72331	0.0382801
AMISG007680	-	1911.97	452.271	-2.0798	0.00604775
AMISG007694	-	180.696	39.3729	-2.19829	0.0218769
AMISG007731	-	75.2174	26.3005	-1.51597	0.0487658
AMISG007769	-	21.2113	7.05212	-1.5887	0.0271527
AMISG008201	PIRTL	50.717	14.9394	-1.76334	0.0282469
AMISG008211	-	16.7952	6.61736	-1.34372	0.0475258
AMISG008270	USP42	4.08833	0.9636	-2.08501	0.0314575
AMISG008312	MAFK	55.0878	14.4974	-1.92594	0.0405744
AMISG008548	HSD3B2	59.0096	13.7483	-2.1017	0.00913986
AMISG008579	BF1	51.4693	16.6935	-1.62443	0.0491647
AMISG008636	PARD3B	76.8474	29.7303	-1.37006	0.0466855
AMISG008637	-	146.848	37.1783	-1.98179	0.0293426
AMISG008823	-	7.02529	0	0	0.0237082
AMISG008864	ZSWIM2	87.585	30.7954	-1.50797	0.00913986
AMISG008959	BAZ1A	19.2514	5.33905	-1.85031	0.00487238
AMISG008994	TMED1	129.46	50.0348	-1.37151	0.0449682
AMISG009001	-	25.0521	8.40278	-1.57599	0.0212344
AMISG009020	CLU	83.2152	19.0401	-2.1278	0.00204108
AMISG009059	TIMP1	696.067	165.282	-2.0743	0.0100622
AMISG009210	-	87.3303	30.3792	-1.5234	0.0282469
AMISG009221	DISC1-1	3.62042	0.739502	-2.29153	0.0149937
AMISG009340	MBNL3-2	52.5713	18.1722	-1.53254	0.0436786
AMISG009424	-	3.26427	0.904443	-1.85166	0.0224934
AMISG009521	-	7.99658	0	0	0.00204108
AMISG009735	-	291.051	46.624	-2.64212	0.00604775
AMISG009906	CDC20B-1	89.2732	18.3948	-2.27893	0.00204108
AMISG009908	MCIDAS	20.576	2.12464	-3.27567	0.00356734
AMISG009955	SREK1IP1	929.879	268.742	-1.79082	0.0100622
AMISG009966	SREK1	163.929	39.2488	-2.06235	0.0172186
AMISG010172	CCDC153L	1.83461	0	0	0.0205944
AMISG010267	DEDD2	89.9451	20.2193	-2.15331	0.0149937
AMISG010301	MAF	761.525	154.386	-2.30235	0.00204108
AMISG010583	-	3.24117	0	0	0.0100622
AMISG010710	SLU7	62.3856	25.191	-1.30831	0.0419301
AMISG010730	TLR22	18.6964	3.94703	-2.24392	0.0324731
AMISG010872	COL23A1	5.40454	0.985095	-2.45584	0.0243004
AMISG010952	-	76.1615	0	0	0.00204108
AMISG011094	UBN1	3.03903	0.333149	-3.18937	0.00204108
AMISG011117	ANAPC15	5.70189	0	0	0.00913986
AMISG011320	-	35.4978	8.15481	-2.12201	0.0410227
AMISG011362	CDC25C	57.0698	16.7267	-1.77057	0.0205944
AMISG011396	GVIN1	3.99737	1.42732	-1.48574	0.0387373
AMISG011532	CCDC173	83.8186	27.438	-1.6111	0.0282469
AMISG011685	MAP3K19	24.3469	5.03382	-2.27402	0.00204108
AMISG011888	FUT6	19.4815	2.83604	-2.78016	0.00356734
AMISG011984	REXO1-1	15.6081	5.29211	-1.56038	0.0410227
AMISG011997	AP3D1	172.243	42.3921	-2.02258	0.00913986
AMISG012001	AMH	151.928	0.565001	-8.07092	0.00204108
AMISG012038	PNMT	18.3829	2.07819	-3.14497	0.00204108
AMISG012153	-	4.12315	0	0	0.0491647
AMISG012176	ANKHD1	13.0479	4.91444	-1.40872	0.0349672
AMISG012248	TBX10	1.76817	0	0	0.00204108
AMISG012262	AGBL2	50.395	12.4447	-2.01775	0.00356734
AMISG012307	C5	9.07399	2.97661	-1.60807	0.0458427
AMISG012359	S100A10	397.912	85.1595	-2.22421	0.0100622
AMISG012366	CTSK	103.109	35.4425	-1.54062	0.0441196
AMISG012437	LRRC71	31.7458	5.70119	-2.47723	0.00204108
AMISG012456	DMXL2	6.01769	1.80019	-1.74106	0.0172186
AMISG012655	KLF9	42.5084	4.30961	-3.30212	0.00204108
AMISG012669	PGM1	10.7302	3.81558	-1.4917	0.0334893
AMISG012701	-	47.7897	11.1872	-2.09485	0.00816017
AMISG012726	-	2188.52	777.54	-1.49297	0.0339876
AMISG012745	EHBP1L1	38.1443	11.6845	-1.70687	0.0218769
AMISG012822	DNMT3B	24.127	9.39763	-1.36028	0.0479451
AMISG012947	KCNJ14	20.2736	0.595045	-5.09046	0.0134561
AMISG012973	-	675.468	119.366	-2.5005	0.0118067
AMISG012977	AVBD12	645.004	13.8254	-5.54391	0.00204108
AMISG013039	-	77.1937	15.8107	-2.28758	0.0309463
AMISG013063	-	2.44515	0.610313	-2.0023	0.0205944
AMISG013204	CROCC2	5.24427	1.42702	-1.87774	0.00487238
AMISG013306	-	109.762	29.4214	-1.89944	0.00204108
AMISG013307	ELN-1	72.9566	26.651	-1.45285	0.0436786
AMISG013533	YPEL5	236.293	87.9408	-1.42597	0.0475258
AMISG013613	SPATA17	104.127	31.052	-1.74559	0.00713776
AMISG013772	OSTN	45.6404	2.20061	-4.37433	0.0329831
AMISG013796	IQCG	38.8176	13.434	-1.53082	0.0462558
AMISG013810	DNALI1	286.765	107.478	-1.41583	0.0436786
AMISG013903	-	13.436	2.36576	-2.50573	0.0142304
AMISG013991	COL9A1	1.89154	0.148212	-3.67383	0.00816017
AMISG014204	LCA5	8.97286	2.11793	-2.08291	0.0387373
AMISG014207	PHIP	24.8025	4.53204	-2.45225	0.00913986
AMISG014221	FILIP1L	98.9568	11.3461	-3.1246	0.00204108
AMISG014225	COL12A1	46.2362	15.3624	-1.58962	0.0192798
AMISG014283	-	23.8343	0	0	0.00204108
AMISG014450	-	20.5244	6.20368	-1.72614	0.00816017
AMISG014517	KMT2D	7.20325	2.04076	-1.81954	0.0109457
AMISG014528	-	5.51214	1.20042	-2.19908	0.0410227
AMISG014662	PHF20L1	89.3526	21.7229	-2.04029	0.00713776
AMISG014761	ARID4A	41.8997	13.5562	-1.62799	0.0324731
AMISG014884	MMP19	33.247	9.84029	-1.75645	0.0218769
AMISG014894	FKBP5	52.4158	18.0778	-1.53578	0.0218769
AMISG014919	ETV7	27.4406	10.8388	-1.3401	0.045404
AMISG014976	IGFN1	9.66862	3.26321	-1.56702	0.0298902
AMISG014985	CACNA1E	2.54339	0.846349	-1.58743	0.045404
AMISG015020	LMOD1	88.8359	15.0089	-2.56532	0.00204108
AMISG015082	-	3.20505	0	0	0.00204108
AMISG015135	-	15.9719	5.19724	-1.61972	0.0491647
AMISG015146	CHGA	374.741	133.619	-1.48776	0.0186027
AMISG015317	TRPV2	3.6805	0.735563	-2.32298	0.0271527
AMISG015335	-	87.1466	16.2535	-2.42269	0.00204108
AMISG015373	ATP1A1	4.77298	1.38447	-1.78555	0.0282469
AMISG015509	NKAP	312.774	110.711	-1.49833	0.0368661
AMISG015522	THOC2	137.739	34.9245	-1.97962	0.0212344
AMISG015632	-	2.23263	0	0	0.00487238
AMISG015708	PCDH9	7.61557	1.48074	-2.36263	0.0126421
AMISG015989	MGA	4.69369	1.55276	-1.59589	0.0479451
AMISG016043	-	26.1741	0	0	0.00204108
AMISG016087	-	56.0431	14.3256	-1.96794	0.0157388
AMISG016097	PSIP1	97.9797	35.8513	-1.45046	0.0423695
AMISG016239	ARHGAP36	5.35877	0.99528	-2.42873	0.0205944
AMISG016326	SOX9	65.7038	8.53476	-2.94455	0.00204108
AMISG016343	-	9.24592	2.20416	-2.06859	0.00204108
AMISG016369	BPTF	6.6814	2.38328	-1.4872	0.0298902
AMISG016403	NOG	1.7072	0	0	0.00204108
AMISG016440	MYCBPAP	17.9435	6.58131	-1.44701	0.0179141
AMISG016449	HEATR9-1	37.881	6.03778	-2.64938	0.00204108
AMISG016526	QRICH2	7.50454	2.54363	-1.56088	0.0491647
AMISG016533	CYGB	30.6144	3.86628	-2.98519	0.00356734
AMISG016566	-	8.59309	0	0	0.0237082
AMISG016735	SLC23A2	14.6635	5.13647	-1.51338	0.0382801
AMISG016761	NEFM	16.1136	5.13927	-1.64864	0.0231024
AMISG016944	-	133.862	2.99383	-5.48261	0.00204108
AMISG016947	-	25.3759	6.14163	-2.04676	0.0254788
AMISG017049	SRPK3-2	25.7133	4.96237	-2.37341	0.00204108
AMISG017092	TAF1C	2.66774	0	0	0.00816017
AMISG017285	CCDC65	23.1197	4.14309	-2.48035	0.0149937
AMISG017320	-	7.81477	0	0	0.00816017
AMISG017506	INHBA	38.0957	5.73336	-2.73218	0.00204108
AMISG017637	COL6A3	12.6096	3.31783	-1.92621	0.00204108
AMISG017756	-	40.8037	6.7608	-2.59344	0.0179141
AMISG017798	-	14.9105	4.9273	-1.59746	0.0186027
AMISG017803	AK9	4.40372	1.54816	-1.50817	0.0354479
AMISG017909	-	29.8527	8.17786	-1.86807	0.0373357
AMISG018092	-	3.33154	0.223344	-3.89885	0.0212344
AMISG018094	-	11.9425	3.74108	-1.67458	0.0428157
AMISG018273	-	40.2403	8.45767	-2.25031	0.00604775
AMISG018398	CCDC103	124.827	43.9477	-1.50608	0.0205944
AMISG018442	KRT14	11.8786	2.05599	-2.53047	0.00204108
AMISG018688	SBNO2	42.0372	12.4494	-1.75559	0.0164845
AMISG018765	MORN3	12.8608	2.89873	-2.14949	0.0368661
AMISG018936	RSPO3	27.0531	7.04221	-1.94169	0.0149937
AMISG018989	AHI1	9.15495	2.48007	-1.88417	0.00204108
AMISG019072	-	9.50085	0	0	0.0172186
AMISG019139	FAM133B	132.949	43.3092	-1.61813	0.0248932
AMISG019581	GAS8	43.6417	15.2086	-1.52082	0.0462558
AMISG019688	CTTNBP2	7.18504	2.54692	-1.49624	0.0231024
AMISG019869	PPP1R12A	10.4905	2.54108	-2.04556	0.0277031
AMISG019916	-	13.5763	3.76139	-1.85175	0.0109457
AMISG019999	LRRIQ1	11.4288	2.19904	-2.37773	0.00204108
AMISG020015	CEP290	19.7732	5.60351	-1.81914	0.0109457
AMISG020016	-	8.381	1.51375	-2.469	0.00204108
AMISG020028	-	28.6529	8.15501	-1.81292	0.00204108
AMISG020056	-	5.96722	0	0	0.0243004
AMISG020144	CFAP54	7.8038	2.4547	-1.66863	0.00816017
AMISG020146	-	177.48	46.5106	-1.93203	0.0314575
AMISG020220	ITSN1	15.1591	5.54022	-1.45217	0.0224934
AMISG020231	-	8.37565	2.94621	-1.50734	0.0282469
AMISG020287	PLAGL2	21.0063	6.72944	-1.64226	0.0363893
AMISG020376	WFIKKN1	16.2454	5.16464	-1.65329	0.0319616
AMISG020423	CFAP70	28.3607	10.8318	-1.38863	0.0391997
AMISG020582	DNAJB13	65.9192	20.622	-1.67651	0.0118067
AMISG020669	-	12.3123	0	0	0.0126421
AMISG020747	-	2.18301	0	0	0.00204108
AMISG020799	-	60.8296	17.0909	-1.83155	0.0260507
AMISG020822	COL24A1	7.56616	2.46449	-1.61827	0.0293426
AMISG020878	ERICH3-1	4.33862	0.884492	-2.29432	0.00487238
AMISG020896	SRSF11-1	510.074	129.346	-1.97947	0.0118067
AMISG021045	ISM2	3.36466	0.356655	-3.23786	0.0401211
AMISG021206	NETO2	26.9829	9.46257	-1.51174	0.0126421
AMISG021432	CC2D2A	9.33878	2.67293	-1.80481	0.0164845
AMISG021717	WDR17	5.37967	1.09231	-2.30014	0.0109457
AMISG021813	MAP9-1	51.65	6.54405	-2.98051	0.00204108
AMISG021866	ZNF827	11.2653	3.33106	-1.75783	0.0164845
AMISG021970	CARD8-2	139.022	28.1006	-2.30663	0.00204108
AMISG021971	-	9.68069	2.96365	-1.70773	0.0237082
AMISG021991	CCDC170	1.92772	0.503973	-1.93547	0.0432549
AMISG021995	AKAP12	33.8227	10.0077	-1.75689	0.0499536
AMISG022135	-	1425.24	399.42	-1.83523	0.0164845
AMISG022190	-	6.29985	0	0	0.0479451
AMISG022255	DDIT4	141.667	40.1396	-1.81941	0.0199504
AMISG022303	CCAR1	137.455	46.4028	-1.56668	0.0179141
AMISG022399	-	2.49636	0	0	0.00204108
AMISG022546	AKAP17A	10.8477	3.24864	-1.73948	0.0277031
AMISG022565	OPCML	104.158	42.381	-1.29728	0.0491647
AMISG022652	COL15A1	9.80048	2.42625	-2.01412	0.00713776
AMISG022734	-	77.7485	20.3538	-1.93352	0.00204108
AMISG022785	CABP1-1	291.221	81.2562	-1.84156	0.0134561
AMISG022899	-	11.6473	3.48093	-1.74245	0.0149937
AMISG023017	-	13.4403	0	0	0.00204108
AMISG023323	-	9.70794	2.51024	-1.95134	0.0224934
AMISG023338	SLC26A4	10.4936	0.461777	-4.50616	0.0149937
AMISG023357	-	37.4221	9.15029	-2.032	0.0142304
AMISG023561	PDIK1L	13.1823	4.25477	-1.63145	0.0391997
AMISG023577	RSRP1	130.103	27.4688	-2.24379	0.00204108
AMISG023692	-	28.987	3.33064	-3.12154	0.00204108
AMISG023895	PABPN1	430.207	139.23	-1.62756	0.0172186
AMISG024030	TOB2	53.2486	16.1157	-1.72428	0.0354479
AMISG024114	LGALS1	4288.72	1345.01	-1.67293	0.0349672
AMISG024117	LGALS2	2332.05	788.19	-1.56498	0.0483608
AMISG024151	HMGXB4	22.6676	6.52748	-1.79603	0.0309463
AMISG024166	PWP1	49.2976	19.1424	-1.36475	0.0243004
AMISG024202	PMCH	10.7523	1.73671	-2.63022	0.0359217
AMISG024385	KCNJ11	34.0767	13.764	-1.30789	0.0499536
AMISG024402	-	8.39778	2.76794	-1.6012	0.0432549
AMISG024415	AKNAD1-1	8.87456	2.657	-1.73988	0.0218769
AMISG024420	LHB	127.584	16.858	-2.91995	0.0118067
AMISG024643	BCHE	18.0468	4.71398	-1.93672	0.00713776
AMISG024660	LRRIQ4	38.4733	6.40044	-2.58761	0.00204108

[truncated: 2 more sheets: Mesonephros 3d Female-biased, Mesonephros 3d Male-biased]
