# Supplementary material for: Improved genome assembly of American alligator genome reveals conserved architecture of estrogen signaling
Source: HighWire-hosted journal article supplement (doi:10.1101/gr.213595.116), 2017-01-30
Supplement: Supplemental_Table_S5.xlsx [file Supplemental_Table_S5.xlsx]

## Sheet: Female-biased genes
GO term ID	GO term description	FDR-adjusted p-value for overrepresentation
GO:0005506	iron ion binding	0.000121786
GO:0020037	heme binding	0.000238423
GO:0033334	fin morphogenesis	0.000439209
GO:0042572	retinol metabolic process	0.000439209
GO:0021536	diencephalon development	0.00126779
GO:0004252	serine-type endopeptidase activity	0.00224104
GO:0055114	oxidation-reduction process	0.00277811
GO:0005540	hyaluronic acid binding	0.00434264
GO:0048703	embryonic viscerocranium morphogenesis	0.00541519
GO:0004001	adenosine kinase activity	0.00546513
GO:0016823	hydrolase activity, acting on acid carbon-carbon bonds, in ketonic substances	0.00546513
GO:0070700	BMP receptor binding	0.00546513
GO:0006524	alanine catabolic process	0.00578794
GO:0009071	serine family amino acid catabolic process	0.00578794
GO:0009074	aromatic amino acid family catabolic process	0.00578794
GO:0042573	retinoic acid metabolic process	0.00578794
GO:0042574	retinal metabolic process	0.00578794
GO:0048014	Tie signaling pathway	0.00578794
GO:0004523	RNA-DNA hybrid ribonuclease activity	0.00642904
GO:0015377	cation:chloride symporter activity	0.00680256
GO:0034453	microtubule anchoring	0.00711891
GO:0016705	oxidoreductase activity, acting on paired donors, with incorporation or reduction of molecular oxygen	0.00771178
GO:0005215	transporter activity	0.00836234
GO:0008083	growth factor activity	0.00886185

## Sheet: Male-biased genes
GO term ID	GO term description	FDR-adjusted p-value for overrepresentation
GO:0016021	integral component of membrane	0.000630186
GO:0005201	extracellular matrix structural constituent	0.00234272
GO:0007601	visual perception	0.00257378
GO:0019068	virion assembly	0.00384526
GO:0008083	growth factor activity	0.00408398
GO:0016048	detection of temperature stimulus	0.00411064
GO:0050951	sensory perception of temperature stimulus	0.00411064
GO:0051791	medium-chain fatty acid metabolic process	0.00411064
GO:0004312	fatty acid synthase activity	0.0043006
GO:0048013	ephrin receptor signaling pathway	0.00751783
